# Supplementary material for: Impact of modulating leptin sensitivity on the transcriptomic profile of adult-derived hypothalamic mouse neurons
Source: Front Mol Neurosci. 2025 Jan 17;17:1518737. doi: 10.3389/fnmol.2024.1518737 (PMC11800294; doi:10.3389/fnmol.2024.1518737)
Supplement: Supplementary Figure S7 — Results of overrepresentation tests in BP terms and KEGG categories for genes affected by leptin receptor antagonist (LANTA) treatment. [file Data_Sheet_7.xlsx]

## Sheet: LANTA BP overrepresentaion
	group	FDR	nGenes	Pathway size	Fold enriched	Pathway	URL	Genes
1	Upregulated	7.1e-34	169	932	2.84843	RNA processing	http://amigo.geneontology.org/amigo/term/GO:0006396	ENSMUSG00000000581, ENSMUSG00000001056, ENSMUSG00000001383, ENSMUSG00000001674, ENSMUSG00000002477, ENSMUSG00000005378, ENSMUSG00000005846, ENSMUSG00000008333, ENSMUSG00000010554, ENSMUSG00000016018, ENSMUSG00000016921, ENSMUSG00000018379, ENSMUSG00000018974, ENSMUSG00000020280, ENSMUSG00000020677, ENSMUSG00000020863, ENSMUSG00000020929, ENSMUSG00000021418, ENSMUSG00000021428, ENSMUSG00000021500,…
2	Upregulated	1.02e-32	108	423	3.87803	Ribonucleoprotein complex biogenesis	http://amigo.geneontology.org/amigo/term/GO:0022613	ENSMUSG00000000355, ENSMUSG00000000581, ENSMUSG00000001056, ENSMUSG00000001674, ENSMUSG00000002477, ENSMUSG00000005378, ENSMUSG00000005846, ENSMUSG00000010554, ENSMUSG00000016018, ENSMUSG00000016921, ENSMUSG00000020290, ENSMUSG00000020677, ENSMUSG00000020863, ENSMUSG00000021149, ENSMUSG00000021418, ENSMUSG00000021428, ENSMUSG00000022247, ENSMUSG00000022300, ENSMUSG00000022557, ENSMUSG00000023106,…
3	Upregulated	1.23e-28	84	295	4.32085	Ribosome biogenesis	http://amigo.geneontology.org/amigo/term/GO:0042254	ENSMUSG00000000581, ENSMUSG00000001056, ENSMUSG00000001674, ENSMUSG00000005378, ENSMUSG00000005846, ENSMUSG00000010554, ENSMUSG00000016018, ENSMUSG00000020290, ENSMUSG00000020677, ENSMUSG00000021149, ENSMUSG00000021418, ENSMUSG00000021428, ENSMUSG00000022247, ENSMUSG00000022300, ENSMUSG00000022557, ENSMUSG00000024528, ENSMUSG00000024608, ENSMUSG00000026019, ENSMUSG00000026127, ENSMUSG00000026377,…
4	Upregulated	2.03e-25	95	406	3.54837	NcRNA processing	http://amigo.geneontology.org/amigo/term/GO:0034470	ENSMUSG00000000581, ENSMUSG00000001056, ENSMUSG00000001674, ENSMUSG00000005378, ENSMUSG00000005846, ENSMUSG00000010554, ENSMUSG00000016018, ENSMUSG00000020280, ENSMUSG00000020677, ENSMUSG00000021418, ENSMUSG00000021428, ENSMUSG00000021595, ENSMUSG00000021905, ENSMUSG00000022191, ENSMUSG00000022300, ENSMUSG00000022325, ENSMUSG00000022557, ENSMUSG00000024446, ENSMUSG00000024528, ENSMUSG00000024608,…
5	Upregulated	6.14e-25	67	215	4.69815	RRNA processing	http://amigo.geneontology.org/amigo/term/GO:0006364	ENSMUSG00000000581, ENSMUSG00000001056, ENSMUSG00000001674, ENSMUSG00000005378, ENSMUSG00000005846, ENSMUSG00000010554, ENSMUSG00000016018, ENSMUSG00000020677, ENSMUSG00000021418, ENSMUSG00000021428, ENSMUSG00000022300, ENSMUSG00000022557, ENSMUSG00000024528, ENSMUSG00000024608, ENSMUSG00000026019, ENSMUSG00000026127, ENSMUSG00000026377, ENSMUSG00000027133, ENSMUSG00000027752, ENSMUSG00000028729,…
6	Upregulated	9.99e-24	70	247	4.31786	RRNA metabolic process	http://amigo.geneontology.org/amigo/term/GO:0016072	ENSMUSG00000000581, ENSMUSG00000001056, ENSMUSG00000001674, ENSMUSG00000005378, ENSMUSG00000005846, ENSMUSG00000010554, ENSMUSG00000016018, ENSMUSG00000020677, ENSMUSG00000021418, ENSMUSG00000021428, ENSMUSG00000022300, ENSMUSG00000022557, ENSMUSG00000024528, ENSMUSG00000024608, ENSMUSG00000026019, ENSMUSG00000026127, ENSMUSG00000026377, ENSMUSG00000027133, ENSMUSG00000027752, ENSMUSG00000028318,…
7	Upregulated	2.16e-22	119	672	2.77713	Translation	http://amigo.geneontology.org/amigo/term/GO:0006412	ENSMUSG00000000355, ENSMUSG00000001380, ENSMUSG00000007892, ENSMUSG00000012405, ENSMUSG00000018848, ENSMUSG00000019782, ENSMUSG00000020982, ENSMUSG00000021905, ENSMUSG00000022336, ENSMUSG00000022370, ENSMUSG00000023106, ENSMUSG00000024258, ENSMUSG00000024360, ENSMUSG00000024608, ENSMUSG00000024902, ENSMUSG00000027170, ENSMUSG00000027374, ENSMUSG00000027680, ENSMUSG00000027752, ENSMUSG00000028936,…
8	Upregulated	3.17e-21	103	536	2.95024	NcRNA metabolic process	http://amigo.geneontology.org/amigo/term/GO:0034660	ENSMUSG00000000581, ENSMUSG00000001056, ENSMUSG00000001380, ENSMUSG00000001674, ENSMUSG00000005378, ENSMUSG00000005846, ENSMUSG00000010554, ENSMUSG00000016018, ENSMUSG00000018848, ENSMUSG00000020280, ENSMUSG00000020677, ENSMUSG00000021418, ENSMUSG00000021428, ENSMUSG00000021595, ENSMUSG00000021905, ENSMUSG00000022191, ENSMUSG00000022300, ENSMUSG00000022325, ENSMUSG00000022557, ENSMUSG00000022792,…
9	Upregulated	3.17e-21	119	696	2.68849	Peptide biosynthetic process	http://amigo.geneontology.org/amigo/term/GO:0043043	ENSMUSG00000000355, ENSMUSG00000001380, ENSMUSG00000007892, ENSMUSG00000012405, ENSMUSG00000018848, ENSMUSG00000019782, ENSMUSG00000020982, ENSMUSG00000021905, ENSMUSG00000022336, ENSMUSG00000022370, ENSMUSG00000023106, ENSMUSG00000024258, ENSMUSG00000024360, ENSMUSG00000024608, ENSMUSG00000024902, ENSMUSG00000027170, ENSMUSG00000027374, ENSMUSG00000027680, ENSMUSG00000027752, ENSMUSG00000028936,…
10	Upregulated	1.17e-18	125	814	2.44182	Amide biosynthetic process	http://amigo.geneontology.org/amigo/term/GO:0043604	ENSMUSG00000000355, ENSMUSG00000001380, ENSMUSG00000007892, ENSMUSG00000012405, ENSMUSG00000018848, ENSMUSG00000019782, ENSMUSG00000020982, ENSMUSG00000021905, ENSMUSG00000022336, ENSMUSG00000022370, ENSMUSG00000023106, ENSMUSG00000024258, ENSMUSG00000024360, ENSMUSG00000024608, ENSMUSG00000024902, ENSMUSG00000026097, ENSMUSG00000026811, ENSMUSG00000027170, ENSMUSG00000027374, ENSMUSG00000027680,…
11	Upregulated	1.65e-18	200	1662	1.93313	Organonitrogen compound biosynthetic process	http://amigo.geneontology.org/amigo/term/GO:1901566	ENSMUSG00000000355, ENSMUSG00000001380, ENSMUSG00000007892, ENSMUSG00000010911, ENSMUSG00000012405, ENSMUSG00000017697, ENSMUSG00000018848, ENSMUSG00000019782, ENSMUSG00000020936, ENSMUSG00000020982, ENSMUSG00000021707, ENSMUSG00000021905, ENSMUSG00000022336, ENSMUSG00000022370, ENSMUSG00000022571, ENSMUSG00000022814, ENSMUSG00000023106, ENSMUSG00000024258, ENSMUSG00000024360, ENSMUSG00000024608,…
12	Upregulated	4.6e-18	129	869	2.35878	Peptide metabolic process	http://amigo.geneontology.org/amigo/term/GO:0006518	ENSMUSG00000000355, ENSMUSG00000001380, ENSMUSG00000007892, ENSMUSG00000012405, ENSMUSG00000018848, ENSMUSG00000019782, ENSMUSG00000020982, ENSMUSG00000021905, ENSMUSG00000021917, ENSMUSG00000022336, ENSMUSG00000022370, ENSMUSG00000023106, ENSMUSG00000024258, ENSMUSG00000024360, ENSMUSG00000024608, ENSMUSG00000024902, ENSMUSG00000027170, ENSMUSG00000027374, ENSMUSG00000027680, ENSMUSG00000027752,…
13	Upregulated	1.02e-16	141	1026	2.17661	Chromosome organization	http://amigo.geneontology.org/amigo/term/GO:0051276	ENSMUSG00000002835, ENSMUSG00000002870, ENSMUSG00000005470, ENSMUSG00000009575, ENSMUSG00000015880, ENSMUSG00000017146, ENSMUSG00000017421, ENSMUSG00000018666, ENSMUSG00000018841, ENSMUSG00000020415, ENSMUSG00000020687, ENSMUSG00000020914, ENSMUSG00000021714, ENSMUSG00000022698, ENSMUSG00000022945, ENSMUSG00000023940, ENSMUSG00000024056, ENSMUSG00000024811, ENSMUSG00000024974, ENSMUSG00000025001,…
14	Upregulated	1.17e-16	47	157	4.53696	Cytoplasmic translation	http://amigo.geneontology.org/amigo/term/GO:0002181	ENSMUSG00000000355, ENSMUSG00000007892, ENSMUSG00000012405, ENSMUSG00000019782, ENSMUSG00000021905, ENSMUSG00000023106, ENSMUSG00000024360, ENSMUSG00000027170, ENSMUSG00000028936, ENSMUSG00000030057, ENSMUSG00000031171, ENSMUSG00000032518, ENSMUSG00000039221, ENSMUSG00000058655, ENSMUSG00000060938, ENSMUSG00000073702, ENSMUSG00000074656, ENSMUSG00000008683, ENSMUSG00000009927, ENSMUSG00000020460,…
15	Upregulated	2.79e-16	140	1020	2.1567	DNA metabolic process	http://amigo.geneontology.org/amigo/term/GO:0006259	ENSMUSG00000002297, ENSMUSG00000002870, ENSMUSG00000005410, ENSMUSG00000006678, ENSMUSG00000006715, ENSMUSG00000015971, ENSMUSG00000017146, ENSMUSG00000018841, ENSMUSG00000020471, ENSMUSG00000020608, ENSMUSG00000020914, ENSMUSG00000021377, ENSMUSG00000021569, ENSMUSG00000023953, ENSMUSG00000024691, ENSMUSG00000024811, ENSMUSG00000025001, ENSMUSG00000025144, ENSMUSG00000025395, ENSMUSG00000026434,…
16	Upregulated	1.77e-14	60	276	3.34063	DNA replication	http://amigo.geneontology.org/amigo/term/GO:0006260	ENSMUSG00000002297, ENSMUSG00000002870, ENSMUSG00000005410, ENSMUSG00000006678, ENSMUSG00000006715, ENSMUSG00000020471, ENSMUSG00000024691, ENSMUSG00000025144, ENSMUSG00000025395, ENSMUSG00000026669, ENSMUSG00000027342, ENSMUSG00000027424, ENSMUSG00000027454, ENSMUSG00000029911, ENSMUSG00000032397, ENSMUSG00000038644, ENSMUSG00000041064, ENSMUSG00000041859, ENSMUSG00000051278, ENSMUSG00000052926,…
17	Upregulated	7.44e-14	142	1126	2.00851	Cellular macromolecule biosynthetic process	http://amigo.geneontology.org/amigo/term/GO:0034645	ENSMUSG00000000355, ENSMUSG00000001380, ENSMUSG00000007892, ENSMUSG00000012405, ENSMUSG00000018848, ENSMUSG00000019782, ENSMUSG00000020936, ENSMUSG00000020982, ENSMUSG00000021905, ENSMUSG00000022336, ENSMUSG00000022370, ENSMUSG00000023106, ENSMUSG00000024258, ENSMUSG00000024360, ENSMUSG00000024608, ENSMUSG00000024902, ENSMUSG00000025173, ENSMUSG00000025728, ENSMUSG00000027170, ENSMUSG00000027374,…
18	Upregulated	1.31e-13	75	441	2.76659	RNA splicing	http://amigo.geneontology.org/amigo/term/GO:0008380	ENSMUSG00000001383, ENSMUSG00000002477, ENSMUSG00000008333, ENSMUSG00000016921, ENSMUSG00000018379, ENSMUSG00000018974, ENSMUSG00000020863, ENSMUSG00000020929, ENSMUSG00000021500, ENSMUSG00000022774, ENSMUSG00000022858, ENSMUSG00000023932, ENSMUSG00000024097, ENSMUSG00000024188, ENSMUSG00000024735, ENSMUSG00000025898, ENSMUSG00000027680, ENSMUSG00000027968, ENSMUSG00000027998, ENSMUSG00000028609,…
19	Upregulated	1.34e-13	141	1132	1.99817	Cellular amide metabolic process	http://amigo.geneontology.org/amigo/term/GO:0043603	ENSMUSG00000000355, ENSMUSG00000001380, ENSMUSG00000007892, ENSMUSG00000012405, ENSMUSG00000018848, ENSMUSG00000019782, ENSMUSG00000020982, ENSMUSG00000021707, ENSMUSG00000021905, ENSMUSG00000021917, ENSMUSG00000022110, ENSMUSG00000022336, ENSMUSG00000022370, ENSMUSG00000023106, ENSMUSG00000024258, ENSMUSG00000024360, ENSMUSG00000024608, ENSMUSG00000024902, ENSMUSG00000025287, ENSMUSG00000026097,…
20	Upregulated	5.64e-13	39	143	4.32661	Oxidative phosphorylation	http://amigo.geneontology.org/amigo/term/GO:0006119	ENSMUSG00000024099, ENSMUSG00000032330, ENSMUSG00000038690, ENSMUSG00000058927, ENSMUSG00000059534, ENSMUSG00000059734, ENSMUSG00000063694, ENSMUSG00000063882, ENSMUSG00000064351, ENSMUSG00000002416, ENSMUSG00000014294, ENSMUSG00000020153, ENSMUSG00000022820, ENSMUSG00000023089, ENSMUSG00000025204, ENSMUSG00000025968, ENSMUSG00000026032, ENSMUSG00000027673, ENSMUSG00000030647, ENSMUSG00000033938,…
21	Upregulated	1.38e-12	295	3168	1.50443	Cellular component biogenesis	http://amigo.geneontology.org/amigo/term/GO:0044085	ENSMUSG00000000058, ENSMUSG00000000355, ENSMUSG00000000581, ENSMUSG00000001056, ENSMUSG00000001674, ENSMUSG00000002477, ENSMUSG00000002835, ENSMUSG00000005378, ENSMUSG00000005470, ENSMUSG00000005846, ENSMUSG00000010554, ENSMUSG00000012443, ENSMUSG00000016018, ENSMUSG00000016382, ENSMUSG00000016921, ENSMUSG00000017421, ENSMUSG00000019988, ENSMUSG00000020024, ENSMUSG00000020153, ENSMUSG00000020290,…
22	Upregulated	2.74e-12	56	301	3.12964	RNA splicing via transesterification reactions	http://amigo.geneontology.org/amigo/term/GO:0000375	ENSMUSG00000001383, ENSMUSG00000002477, ENSMUSG00000008333, ENSMUSG00000016921, ENSMUSG00000018379, ENSMUSG00000018974, ENSMUSG00000020863, ENSMUSG00000020929, ENSMUSG00000021500, ENSMUSG00000022774, ENSMUSG00000022858, ENSMUSG00000023932, ENSMUSG00000024097, ENSMUSG00000024188, ENSMUSG00000024735, ENSMUSG00000025898, ENSMUSG00000027680, ENSMUSG00000027968, ENSMUSG00000027998, ENSMUSG00000028902,…
23	Upregulated	2.74e-12	56	301	3.12964	RNA splicing via transesterification reactions with bulged adenosine as nucleophile	http://amigo.geneontology.org/amigo/term/GO:0000377	ENSMUSG00000001383, ENSMUSG00000002477, ENSMUSG00000008333, ENSMUSG00000016921, ENSMUSG00000018379, ENSMUSG00000018974, ENSMUSG00000020863, ENSMUSG00000020929, ENSMUSG00000021500, ENSMUSG00000022774, ENSMUSG00000022858, ENSMUSG00000023932, ENSMUSG00000024097, ENSMUSG00000024188, ENSMUSG00000024735, ENSMUSG00000025898, ENSMUSG00000027680, ENSMUSG00000027968, ENSMUSG00000027998, ENSMUSG00000028902,…
24	Upregulated	2.74e-12	56	301	3.12964	MRNA splicing via spliceosome	http://amigo.geneontology.org/amigo/term/GO:0000398	ENSMUSG00000001383, ENSMUSG00000002477, ENSMUSG00000008333, ENSMUSG00000016921, ENSMUSG00000018379, ENSMUSG00000018974, ENSMUSG00000020863, ENSMUSG00000020929, ENSMUSG00000021500, ENSMUSG00000022774, ENSMUSG00000022858, ENSMUSG00000023932, ENSMUSG00000024097, ENSMUSG00000024188, ENSMUSG00000024735, ENSMUSG00000025898, ENSMUSG00000027680, ENSMUSG00000027968, ENSMUSG00000027998, ENSMUSG00000028902,…
25	Upregulated	8.22e-12	76	484	2.53318	MRNA processing	http://amigo.geneontology.org/amigo/term/GO:0006397	ENSMUSG00000001383, ENSMUSG00000002477, ENSMUSG00000008333, ENSMUSG00000016921, ENSMUSG00000018379, ENSMUSG00000018974, ENSMUSG00000020863, ENSMUSG00000020929, ENSMUSG00000021500, ENSMUSG00000022774, ENSMUSG00000022858, ENSMUSG00000023932, ENSMUSG00000024097, ENSMUSG00000024188, ENSMUSG00000024258, ENSMUSG00000024735, ENSMUSG00000025898, ENSMUSG00000027680, ENSMUSG00000027968, ENSMUSG00000027998,…
26	Upregulated	5.68e-11	110	838	2.04405	Cellular response to DNA damage stimulus	http://amigo.geneontology.org/amigo/term/GO:0006974	ENSMUSG00000002870, ENSMUSG00000005410, ENSMUSG00000006360, ENSMUSG00000015971, ENSMUSG00000017146, ENSMUSG00000018841, ENSMUSG00000019942, ENSMUSG00000020608, ENSMUSG00000021377, ENSMUSG00000023953, ENSMUSG00000026278, ENSMUSG00000026434, ENSMUSG00000027342, ENSMUSG00000027680, ENSMUSG00000028224, ENSMUSG00000028687, ENSMUSG00000029591, ENSMUSG00000029863, ENSMUSG00000031201, ENSMUSG00000032498,…
27	Upregulated	9.86e-11	37	146	3.87348	DNA-templated DNA replication	http://amigo.geneontology.org/amigo/term/GO:0006261	ENSMUSG00000002297, ENSMUSG00000002870, ENSMUSG00000005410, ENSMUSG00000006678, ENSMUSG00000020471, ENSMUSG00000025144, ENSMUSG00000025395, ENSMUSG00000026669, ENSMUSG00000027342, ENSMUSG00000027424, ENSMUSG00000027454, ENSMUSG00000029911, ENSMUSG00000032397, ENSMUSG00000038644, ENSMUSG00000041859, ENSMUSG00000051278, ENSMUSG00000073705, ENSMUSG00000017146, ENSMUSG00000028224, ENSMUSG00000041238,…
28	Upregulated	1.18e-10	42	183	3.48806	Ribonucleoprotein complex assembly	http://amigo.geneontology.org/amigo/term/GO:0022618	ENSMUSG00000000355, ENSMUSG00000002477, ENSMUSG00000016921, ENSMUSG00000020863, ENSMUSG00000022247, ENSMUSG00000023106, ENSMUSG00000024188, ENSMUSG00000024258, ENSMUSG00000024608, ENSMUSG00000029066, ENSMUSG00000030224, ENSMUSG00000032518, ENSMUSG00000036781, ENSMUSG00000038510, ENSMUSG00000040824, ENSMUSG00000040952, ENSMUSG00000055760, ENSMUSG00000058558, ENSMUSG00000058655, ENSMUSG00000063457,…
29	Upregulated	1.47e-10	26	80	5.22312	ATP synthesis coupled electron transport	http://amigo.geneontology.org/amigo/term/GO:0042773	ENSMUSG00000024099, ENSMUSG00000058927, ENSMUSG00000059534, ENSMUSG00000059734, ENSMUSG00000063694, ENSMUSG00000063882, ENSMUSG00000064351, ENSMUSG00000064370, ENSMUSG00000014313, ENSMUSG00000019942, ENSMUSG00000020153, ENSMUSG00000021520, ENSMUSG00000025204, ENSMUSG00000025968, ENSMUSG00000028964, ENSMUSG00000030647, ENSMUSG00000032330, ENSMUSG00000041431, ENSMUSG00000064341, ENSMUSG00000064345,…
30	Upregulated	1.47e-10	26	78	5.22312	Mitochondrial ATP synthesis coupled electron transport	http://amigo.geneontology.org/amigo/term/GO:0042775	ENSMUSG00000024099, ENSMUSG00000058927, ENSMUSG00000059534, ENSMUSG00000059734, ENSMUSG00000063694, ENSMUSG00000063882, ENSMUSG00000064351, ENSMUSG00000064370, ENSMUSG00000014313, ENSMUSG00000019942, ENSMUSG00000020153, ENSMUSG00000021520, ENSMUSG00000025204, ENSMUSG00000025968, ENSMUSG00000028964, ENSMUSG00000030647, ENSMUSG00000032330, ENSMUSG00000041431, ENSMUSG00000064341, ENSMUSG00000064345,…
31	Upregulated	1.51e-10	23	59	5.89506	NADH dehydrogenase complex assembly	http://amigo.geneontology.org/amigo/term/GO:0010257	ENSMUSG00000020153, ENSMUSG00000026032, ENSMUSG00000028261, ENSMUSG00000059734, ENSMUSG00000078572, ENSMUSG00000002416, ENSMUSG00000014294, ENSMUSG00000021764, ENSMUSG00000022820, ENSMUSG00000023089, ENSMUSG00000024645, ENSMUSG00000025204, ENSMUSG00000025968, ENSMUSG00000027305, ENSMUSG00000027673, ENSMUSG00000030647, ENSMUSG00000033938, ENSMUSG00000064341, ENSMUSG00000064345, ENSMUSG00000064363,…
32	Upregulated	1.51e-10	23	59	5.89506	Mitochondrial respiratory chain complex I assembly	http://amigo.geneontology.org/amigo/term/GO:0032981	ENSMUSG00000020153, ENSMUSG00000026032, ENSMUSG00000028261, ENSMUSG00000059734, ENSMUSG00000078572, ENSMUSG00000002416, ENSMUSG00000014294, ENSMUSG00000021764, ENSMUSG00000022820, ENSMUSG00000023089, ENSMUSG00000024645, ENSMUSG00000025204, ENSMUSG00000025968, ENSMUSG00000027305, ENSMUSG00000027673, ENSMUSG00000030647, ENSMUSG00000033938, ENSMUSG00000064341, ENSMUSG00000064345, ENSMUSG00000064363,…
33	Upregulated	1.66e-10	25	71	5.38616	Ribosomal large subunit biogenesis	http://amigo.geneontology.org/amigo/term/GO:0042273	ENSMUSG00000001056, ENSMUSG00000001674, ENSMUSG00000005846, ENSMUSG00000021149, ENSMUSG00000022247, ENSMUSG00000022557, ENSMUSG00000026019, ENSMUSG00000026377, ENSMUSG00000028729, ENSMUSG00000028741, ENSMUSG00000029066, ENSMUSG00000031917, ENSMUSG00000032215, ENSMUSG00000038510, ENSMUSG00000043716, ENSMUSG00000057113, ENSMUSG00000058558, ENSMUSG00000060739, ENSMUSG00000060938, ENSMUSG00000063480,…
34	Upregulated	2.15e-10	42	197	3.41182	Aerobic respiration	http://amigo.geneontology.org/amigo/term/GO:0009060	ENSMUSG00000020153, ENSMUSG00000020321, ENSMUSG00000022110, ENSMUSG00000024099, ENSMUSG00000032330, ENSMUSG00000038690, ENSMUSG00000058927, ENSMUSG00000059534, ENSMUSG00000059734, ENSMUSG00000063694, ENSMUSG00000063882, ENSMUSG00000064341, ENSMUSG00000064351, ENSMUSG00000064363, ENSMUSG00000002416, ENSMUSG00000014294, ENSMUSG00000022820, ENSMUSG00000023089, ENSMUSG00000025204, ENSMUSG00000025968,…
35	Upregulated	2.7e-10	95	717	2.11732	MRNA metabolic process	http://amigo.geneontology.org/amigo/term/GO:0016071	ENSMUSG00000001383, ENSMUSG00000001415, ENSMUSG00000002477, ENSMUSG00000008333, ENSMUSG00000016921, ENSMUSG00000018379, ENSMUSG00000018974, ENSMUSG00000020863, ENSMUSG00000020929, ENSMUSG00000021500, ENSMUSG00000022774, ENSMUSG00000022858, ENSMUSG00000023932, ENSMUSG00000024097, ENSMUSG00000024188, ENSMUSG00000024258, ENSMUSG00000024735, ENSMUSG00000025898, ENSMUSG00000025962, ENSMUSG00000027201,…
36	Upregulated	2.7e-10	33	131	4.08809	Electron transport chain	http://amigo.geneontology.org/amigo/term/GO:0022900	ENSMUSG00000023089, ENSMUSG00000024099, ENSMUSG00000058927, ENSMUSG00000059534, ENSMUSG00000059734, ENSMUSG00000063694, ENSMUSG00000063882, ENSMUSG00000064351, ENSMUSG00000064370, ENSMUSG00000004610, ENSMUSG00000014294, ENSMUSG00000014313, ENSMUSG00000019942, ENSMUSG00000020153, ENSMUSG00000021520, ENSMUSG00000021764, ENSMUSG00000025204, ENSMUSG00000025968, ENSMUSG00000026032, ENSMUSG00000028964,…
37	Upregulated	3.01e-10	23	63	5.69855	Proton motive force-driven mitochondrial ATP synthesis	http://amigo.geneontology.org/amigo/term/GO:0042776	ENSMUSG00000038690, ENSMUSG00000002416, ENSMUSG00000014294, ENSMUSG00000020153, ENSMUSG00000022820, ENSMUSG00000023089, ENSMUSG00000024099, ENSMUSG00000025204, ENSMUSG00000025968, ENSMUSG00000026032, ENSMUSG00000027673, ENSMUSG00000030647, ENSMUSG00000033938, ENSMUSG00000059734, ENSMUSG00000064341, ENSMUSG00000064345, ENSMUSG00000064363, ENSMUSG00000064367, ENSMUSG00000064368, ENSMUSG00000022890,…
38	Upregulated	3.01e-10	163	1538	1.71125	Protein-containing complex assembly	http://amigo.geneontology.org/amigo/term/GO:0065003	ENSMUSG00000000355, ENSMUSG00000002477, ENSMUSG00000002835, ENSMUSG00000016921, ENSMUSG00000019988, ENSMUSG00000020153, ENSMUSG00000020386, ENSMUSG00000020863, ENSMUSG00000021832, ENSMUSG00000022247, ENSMUSG00000022437, ENSMUSG00000022945, ENSMUSG00000023106, ENSMUSG00000024188, ENSMUSG00000024258, ENSMUSG00000024608, ENSMUSG00000024759, ENSMUSG00000025001, ENSMUSG00000026032, ENSMUSG00000028261,…
39	Upregulated	3.34e-10	42	190	3.35679	Ribonucleoprotein complex subunit organization	http://amigo.geneontology.org/amigo/term/GO:0071826	ENSMUSG00000000355, ENSMUSG00000002477, ENSMUSG00000016921, ENSMUSG00000020863, ENSMUSG00000022247, ENSMUSG00000023106, ENSMUSG00000024188, ENSMUSG00000024258, ENSMUSG00000024608, ENSMUSG00000029066, ENSMUSG00000030224, ENSMUSG00000032518, ENSMUSG00000036781, ENSMUSG00000038510, ENSMUSG00000040824, ENSMUSG00000040952, ENSMUSG00000055760, ENSMUSG00000058558, ENSMUSG00000058655, ENSMUSG00000063457,…
40	Upregulated	3.36e-10	359	4571	1.36631	RNA metabolic process	http://amigo.geneontology.org/amigo/term/GO:0016070	ENSMUSG00000000317, ENSMUSG00000000581, ENSMUSG00000001056, ENSMUSG00000001380, ENSMUSG00000001383, ENSMUSG00000001415, ENSMUSG00000001674, ENSMUSG00000002221, ENSMUSG00000002477, ENSMUSG00000002679, ENSMUSG00000003929, ENSMUSG00000005378, ENSMUSG00000005846, ENSMUSG00000008333, ENSMUSG00000009575, ENSMUSG00000010554, ENSMUSG00000015217, ENSMUSG00000015289, ENSMUSG00000015971, ENSMUSG00000016018,…
41	Upregulated	5.36e-10	372	4781	1.35012	Cellular nitrogen compound biosynthetic process	http://amigo.geneontology.org/amigo/term/GO:0044271	ENSMUSG00000000317, ENSMUSG00000000355, ENSMUSG00000001380, ENSMUSG00000002221, ENSMUSG00000002679, ENSMUSG00000003929, ENSMUSG00000007892, ENSMUSG00000009575, ENSMUSG00000012405, ENSMUSG00000015217, ENSMUSG00000015971, ENSMUSG00000017146, ENSMUSG00000017697, ENSMUSG00000018666, ENSMUSG00000018848, ENSMUSG00000018983, ENSMUSG00000019782, ENSMUSG00000019837, ENSMUSG00000020074, ENSMUSG00000020739,…
42	Upregulated	6.19e-10	176	1784	1.6528	Cell cycle	http://amigo.geneontology.org/amigo/term/GO:0007049	ENSMUSG00000001774, ENSMUSG00000002297, ENSMUSG00000002870, ENSMUSG00000005732, ENSMUSG00000006678, ENSMUSG00000006715, ENSMUSG00000012443, ENSMUSG00000015880, ENSMUSG00000017421, ENSMUSG00000017716, ENSMUSG00000018841, ENSMUSG00000019942, ENSMUSG00000019988, ENSMUSG00000020415, ENSMUSG00000020492, ENSMUSG00000020687, ENSMUSG00000020897, ENSMUSG00000020914, ENSMUSG00000021569, ENSMUSG00000021714,…
43	Upregulated	6.72e-10	81	559	2.23401	DNA repair	http://amigo.geneontology.org/amigo/term/GO:0006281	ENSMUSG00000002870, ENSMUSG00000005410, ENSMUSG00000015971, ENSMUSG00000017146, ENSMUSG00000018841, ENSMUSG00000020608, ENSMUSG00000021377, ENSMUSG00000023953, ENSMUSG00000026434, ENSMUSG00000027342, ENSMUSG00000028224, ENSMUSG00000028687, ENSMUSG00000029591, ENSMUSG00000031201, ENSMUSG00000032498, ENSMUSG00000033596, ENSMUSG00000034021, ENSMUSG00000034206, ENSMUSG00000034329, ENSMUSG00000034345,…
44	Upregulated	6.72e-10	29	105	4.39906	Respiratory electron transport chain	http://amigo.geneontology.org/amigo/term/GO:0022904	ENSMUSG00000023089, ENSMUSG00000024099, ENSMUSG00000058927, ENSMUSG00000059534, ENSMUSG00000059734, ENSMUSG00000063694, ENSMUSG00000063882, ENSMUSG00000064351, ENSMUSG00000064370, ENSMUSG00000004610, ENSMUSG00000014313, ENSMUSG00000019942, ENSMUSG00000020153, ENSMUSG00000021520, ENSMUSG00000025204, ENSMUSG00000025968, ENSMUSG00000028964, ENSMUSG00000030647, ENSMUSG00000032330, ENSMUSG00000036932,…
45	Upregulated	9.48e-10	177	1735	1.64043	Protein-containing complex organization	http://amigo.geneontology.org/amigo/term/GO:0043933	ENSMUSG00000000355, ENSMUSG00000002477, ENSMUSG00000002835, ENSMUSG00000004891, ENSMUSG00000016921, ENSMUSG00000019988, ENSMUSG00000020153, ENSMUSG00000020386, ENSMUSG00000020863, ENSMUSG00000021832, ENSMUSG00000022247, ENSMUSG00000022437, ENSMUSG00000022945, ENSMUSG00000023106, ENSMUSG00000024188, ENSMUSG00000024258, ENSMUSG00000024360, ENSMUSG00000024608, ENSMUSG00000024759, ENSMUSG00000025001,…
46	Upregulated	1.17e-09	60	367	2.57788	Chromosome segregation	http://amigo.geneontology.org/amigo/term/GO:0007059	ENSMUSG00000005233, ENSMUSG00000015880, ENSMUSG00000017421, ENSMUSG00000020415, ENSMUSG00000020492, ENSMUSG00000020687, ENSMUSG00000020914, ENSMUSG00000021714, ENSMUSG00000022698, ENSMUSG00000023940, ENSMUSG00000024056, ENSMUSG00000024974, ENSMUSG00000025144, ENSMUSG00000026683, ENSMUSG00000027115, ENSMUSG00000027635, ENSMUSG00000028312, ENSMUSG00000029176, ENSMUSG00000029910, ENSMUSG00000030649,…
47	Upregulated	1.88e-09	47	256	2.94807	Cellular respiration	http://amigo.geneontology.org/amigo/term/GO:0045333	ENSMUSG00000020153, ENSMUSG00000020321, ENSMUSG00000022110, ENSMUSG00000023089, ENSMUSG00000024099, ENSMUSG00000032330, ENSMUSG00000038690, ENSMUSG00000058927, ENSMUSG00000059534, ENSMUSG00000059734, ENSMUSG00000063694, ENSMUSG00000063882, ENSMUSG00000064341, ENSMUSG00000064351, ENSMUSG00000064363, ENSMUSG00000002416, ENSMUSG00000014294, ENSMUSG00000022820, ENSMUSG00000025204, ENSMUSG00000025968,…
48	Upregulated	2.37e-09	23	70	5.1805	Proton motive force-driven ATP synthesis	http://amigo.geneontology.org/amigo/term/GO:0015986	ENSMUSG00000025781, ENSMUSG00000034566, ENSMUSG00000038690, ENSMUSG00000002416, ENSMUSG00000014294, ENSMUSG00000020153, ENSMUSG00000022820, ENSMUSG00000023089, ENSMUSG00000024099, ENSMUSG00000025204, ENSMUSG00000025968, ENSMUSG00000026032, ENSMUSG00000027673, ENSMUSG00000030647, ENSMUSG00000033938, ENSMUSG00000059734, ENSMUSG00000064341, ENSMUSG00000064345, ENSMUSG00000064363, ENSMUSG00000064367,…
49	Upregulated	4.04e-09	95	733	2.00889	Mitotic cell cycle process	http://amigo.geneontology.org/amigo/term/GO:1903047	ENSMUSG00000002870, ENSMUSG00000005732, ENSMUSG00000006678, ENSMUSG00000012443, ENSMUSG00000015880, ENSMUSG00000017421, ENSMUSG00000019942, ENSMUSG00000020415, ENSMUSG00000020687, ENSMUSG00000020897, ENSMUSG00000021714, ENSMUSG00000022698, ENSMUSG00000023940, ENSMUSG00000024056, ENSMUSG00000024974, ENSMUSG00000024989, ENSMUSG00000026683, ENSMUSG00000026753, ENSMUSG00000027115, ENSMUSG00000027454,…
50	Upregulated	4.61e-09	23	68	5.02814	Ribosomal small subunit biogenesis	http://amigo.geneontology.org/amigo/term/GO:0042274	ENSMUSG00000020677, ENSMUSG00000021418, ENSMUSG00000021428, ENSMUSG00000022300, ENSMUSG00000024528, ENSMUSG00000024608, ENSMUSG00000031683, ENSMUSG00000032518, ENSMUSG00000033285, ENSMUSG00000035575, ENSMUSG00000036781, ENSMUSG00000038335, ENSMUSG00000040952, ENSMUSG00000057113, ENSMUSG00000061477, ENSMUSG00000063457, ENSMUSG00000063480, ENSMUSG00000009927, ENSMUSG00000025290, ENSMUSG00000032977,…
51	Downregulated	8.59e-19	381	3834	1.55475	Response to stress	http://amigo.geneontology.org/amigo/term/GO:0006950	ENSMUSG00000001924, ENSMUSG00000002250, ENSMUSG00000002948, ENSMUSG00000002983, ENSMUSG00000004040, ENSMUSG00000005161, ENSMUSG00000005413, ENSMUSG00000006345, ENSMUSG00000008429, ENSMUSG00000008730, ENSMUSG00000014905, ENSMUSG00000015839, ENSMUSG00000020108, ENSMUSG00000020641, ENSMUSG00000020823, ENSMUSG00000020964, ENSMUSG00000022307, ENSMUSG00000022565, ENSMUSG00000022575, ENSMUSG00000022971,…
52	Downregulated	4.69e-18	329	3162	1.61282	Cellular response to chemical stimulus	http://amigo.geneontology.org/amigo/term/GO:0070887	ENSMUSG00000001288, ENSMUSG00000002250, ENSMUSG00000002603, ENSMUSG00000004040, ENSMUSG00000005161, ENSMUSG00000006127, ENSMUSG00000008429, ENSMUSG00000015839, ENSMUSG00000020889, ENSMUSG00000021756, ENSMUSG00000022812, ENSMUSG00000022818, ENSMUSG00000022971, ENSMUSG00000023010, ENSMUSG00000023951, ENSMUSG00000024052, ENSMUSG00000024359, ENSMUSG00000024427, ENSMUSG00000024515, ENSMUSG00000024962,…
53	Downregulated	3.1e-17	336	3454	1.57997	Response to organic substance	http://amigo.geneontology.org/amigo/term/GO:0010033	ENSMUSG00000001288, ENSMUSG00000002250, ENSMUSG00000002603, ENSMUSG00000002983, ENSMUSG00000004040, ENSMUSG00000005514, ENSMUSG00000006127, ENSMUSG00000008429, ENSMUSG00000014905, ENSMUSG00000020889, ENSMUSG00000020964, ENSMUSG00000021756, ENSMUSG00000022812, ENSMUSG00000022971, ENSMUSG00000023010, ENSMUSG00000023951, ENSMUSG00000024052, ENSMUSG00000024359, ENSMUSG00000024427, ENSMUSG00000024515,…
54	Downregulated	1.03e-15	269	2498	1.66165	Cellular response to organic substance	http://amigo.geneontology.org/amigo/term/GO:0071310	ENSMUSG00000001288, ENSMUSG00000002250, ENSMUSG00000002603, ENSMUSG00000004040, ENSMUSG00000006127, ENSMUSG00000008429, ENSMUSG00000020889, ENSMUSG00000021756, ENSMUSG00000022812, ENSMUSG00000022971, ENSMUSG00000023010, ENSMUSG00000023951, ENSMUSG00000024052, ENSMUSG00000024359, ENSMUSG00000024427, ENSMUSG00000024515, ENSMUSG00000024962, ENSMUSG00000025491, ENSMUSG00000025492, ENSMUSG00000026072,…
55	Downregulated	3.05e-13	254	2595	1.62018	Immune system process	http://amigo.geneontology.org/amigo/term/GO:0002376	ENSMUSG00000002325, ENSMUSG00000002983, ENSMUSG00000005161, ENSMUSG00000006345, ENSMUSG00000019842, ENSMUSG00000020641, ENSMUSG00000020823, ENSMUSG00000021477, ENSMUSG00000022971, ENSMUSG00000023951, ENSMUSG00000024308, ENSMUSG00000024457, ENSMUSG00000024927, ENSMUSG00000024962, ENSMUSG00000025491, ENSMUSG00000025492, ENSMUSG00000025498, ENSMUSG00000026896, ENSMUSG00000027514, ENSMUSG00000027843,…
56	Downregulated	3.92e-11	208	1876	1.65356	Positive regulation of RNA metabolic process	http://amigo.geneontology.org/amigo/term/GO:0051254	ENSMUSG00000001288, ENSMUSG00000002028, ENSMUSG00000002250, ENSMUSG00000003119, ENSMUSG00000006932, ENSMUSG00000007880, ENSMUSG00000020889, ENSMUSG00000021838, ENSMUSG00000022463, ENSMUSG00000022974, ENSMUSG00000023055, ENSMUSG00000024052, ENSMUSG00000024826, ENSMUSG00000025066, ENSMUSG00000026571, ENSMUSG00000027803, ENSMUSG00000028211, ENSMUSG00000029647, ENSMUSG00000030557, ENSMUSG00000031925,…
57	Downregulated	5.48e-11	340	3610	1.42938	Positive regulation of macromolecule metabolic process	http://amigo.geneontology.org/amigo/term/GO:0010604	ENSMUSG00000001288, ENSMUSG00000002028, ENSMUSG00000002250, ENSMUSG00000002603, ENSMUSG00000003119, ENSMUSG00000006932, ENSMUSG00000007880, ENSMUSG00000019907, ENSMUSG00000020889, ENSMUSG00000021838, ENSMUSG00000022216, ENSMUSG00000022463, ENSMUSG00000022974, ENSMUSG00000023055, ENSMUSG00000023951, ENSMUSG00000024052, ENSMUSG00000024425, ENSMUSG00000024589, ENSMUSG00000024594, ENSMUSG00000024826,…
58	Downregulated	2.63e-10	256	2477	1.52278	Catabolic process	http://amigo.geneontology.org/amigo/term/GO:0009056	ENSMUSG00000000326, ENSMUSG00000001924, ENSMUSG00000003123, ENSMUSG00000003812, ENSMUSG00000005413, ENSMUSG00000006127, ENSMUSG00000006345, ENSMUSG00000008348, ENSMUSG00000014905, ENSMUSG00000015806, ENSMUSG00000015837, ENSMUSG00000020964, ENSMUSG00000021179, ENSMUSG00000021240, ENSMUSG00000021477, ENSMUSG00000021794, ENSMUSG00000021838, ENSMUSG00000021939, ENSMUSG00000022216, ENSMUSG00000022270,…
59	Downregulated	3.04e-10	226	2099	1.57161	Cellular catabolic process	http://amigo.geneontology.org/amigo/term/GO:0044248	ENSMUSG00000000326, ENSMUSG00000001924, ENSMUSG00000003123, ENSMUSG00000003812, ENSMUSG00000005413, ENSMUSG00000006345, ENSMUSG00000008348, ENSMUSG00000014905, ENSMUSG00000015806, ENSMUSG00000015837, ENSMUSG00000020964, ENSMUSG00000021179, ENSMUSG00000021240, ENSMUSG00000021477, ENSMUSG00000021794, ENSMUSG00000021838, ENSMUSG00000021939, ENSMUSG00000022216, ENSMUSG00000022270, ENSMUSG00000022425,…
60	Downregulated	3.04e-10	54	299	2.93752	Defense response to virus	http://amigo.geneontology.org/amigo/term/GO:0051607	ENSMUSG00000020641, ENSMUSG00000020823, ENSMUSG00000025491, ENSMUSG00000025492, ENSMUSG00000027843, ENSMUSG00000029561, ENSMUSG00000032661, ENSMUSG00000034459, ENSMUSG00000035208, ENSMUSG00000037921, ENSMUSG00000041827, ENSMUSG00000046718, ENSMUSG00000052776, ENSMUSG00000062488, ENSMUSG00000066800, ENSMUSG00000074896, ENSMUSG00000035042, ENSMUSG00000000275, ENSMUSG00000025034, ENSMUSG00000027514,…
61	Downregulated	3.04e-10	54	300	2.93752	Defense response to symbiont	http://amigo.geneontology.org/amigo/term/GO:0140546	ENSMUSG00000020641, ENSMUSG00000020823, ENSMUSG00000025491, ENSMUSG00000025492, ENSMUSG00000027843, ENSMUSG00000029561, ENSMUSG00000032661, ENSMUSG00000034459, ENSMUSG00000035208, ENSMUSG00000037921, ENSMUSG00000041827, ENSMUSG00000046718, ENSMUSG00000052776, ENSMUSG00000062488, ENSMUSG00000066800, ENSMUSG00000074896, ENSMUSG00000035042, ENSMUSG00000000275, ENSMUSG00000025034, ENSMUSG00000027514,…
62	Downregulated	3.94e-10	261	2831	1.50411	Response to external stimulus	http://amigo.geneontology.org/amigo/term/GO:0009605	ENSMUSG00000002250, ENSMUSG00000002983, ENSMUSG00000006345, ENSMUSG00000015647, ENSMUSG00000020099, ENSMUSG00000020641, ENSMUSG00000020823, ENSMUSG00000022263, ENSMUSG00000022575, ENSMUSG00000022971, ENSMUSG00000023951, ENSMUSG00000024457, ENSMUSG00000024927, ENSMUSG00000024962, ENSMUSG00000025491, ENSMUSG00000025492, ENSMUSG00000026072, ENSMUSG00000026896, ENSMUSG00000027514, ENSMUSG00000027843,…
63	Downregulated	5.32e-10	358	3929	1.38308	Positive regulation of metabolic process	http://amigo.geneontology.org/amigo/term/GO:0009893	ENSMUSG00000001288, ENSMUSG00000002028, ENSMUSG00000002250, ENSMUSG00000002603, ENSMUSG00000003119, ENSMUSG00000006932, ENSMUSG00000007880, ENSMUSG00000019907, ENSMUSG00000020889, ENSMUSG00000021838, ENSMUSG00000022216, ENSMUSG00000022463, ENSMUSG00000022974, ENSMUSG00000023055, ENSMUSG00000023951, ENSMUSG00000024052, ENSMUSG00000024425, ENSMUSG00000024589, ENSMUSG00000024594, ENSMUSG00000024826,…
64	Downregulated	8.14e-10	220	2089	1.56539	Positive regulation of nucleobase-containing compound metabolic process	http://amigo.geneontology.org/amigo/term/GO:0045935	ENSMUSG00000001288, ENSMUSG00000002028, ENSMUSG00000002250, ENSMUSG00000003119, ENSMUSG00000006932, ENSMUSG00000007880, ENSMUSG00000020889, ENSMUSG00000021838, ENSMUSG00000022463, ENSMUSG00000022974, ENSMUSG00000023055, ENSMUSG00000024052, ENSMUSG00000024826, ENSMUSG00000025066, ENSMUSG00000026571, ENSMUSG00000027803, ENSMUSG00000028211, ENSMUSG00000029647, ENSMUSG00000030557, ENSMUSG00000031529,…
65	Downregulated	8.32e-10	118	961	1.9296	Response to cytokine	http://amigo.geneontology.org/amigo/term/GO:0034097	ENSMUSG00000002983, ENSMUSG00000004040, ENSMUSG00000021756, ENSMUSG00000022971, ENSMUSG00000024927, ENSMUSG00000025491, ENSMUSG00000025492, ENSMUSG00000026072, ENSMUSG00000026637, ENSMUSG00000027514, ENSMUSG00000028268, ENSMUSG00000028270, ENSMUSG00000029371, ENSMUSG00000029380, ENSMUSG00000034855, ENSMUSG00000035042, ENSMUSG00000040253, ENSMUSG00000046879, ENSMUSG00000073490, ENSMUSG00000073555,…
66	Downregulated	1.09e-09	306	3215	1.42745	Positive regulation of nitrogen compound metabolic process	http://amigo.geneontology.org/amigo/term/GO:0051173	ENSMUSG00000001288, ENSMUSG00000002028, ENSMUSG00000002250, ENSMUSG00000002603, ENSMUSG00000003119, ENSMUSG00000006932, ENSMUSG00000007880, ENSMUSG00000019907, ENSMUSG00000020889, ENSMUSG00000021838, ENSMUSG00000022216, ENSMUSG00000022463, ENSMUSG00000022974, ENSMUSG00000023055, ENSMUSG00000023951, ENSMUSG00000024052, ENSMUSG00000024425, ENSMUSG00000024589, ENSMUSG00000024594, ENSMUSG00000024826,…
67	Downregulated	2.27e-09	29	99	4.34705	Negative regulation of viral process	http://amigo.geneontology.org/amigo/term/GO:0048525	ENSMUSG00000025491, ENSMUSG00000025492, ENSMUSG00000029561, ENSMUSG00000032661, ENSMUSG00000041827, ENSMUSG00000052776, ENSMUSG00000066800, ENSMUSG00000000275, ENSMUSG00000025034, ENSMUSG00000046718, ENSMUSG00000006127, ENSMUSG00000009741, ENSMUSG00000020641, ENSMUSG00000022587, ENSMUSG00000024457, ENSMUSG00000026104, ENSMUSG00000026896, ENSMUSG00000029826, ENSMUSG00000035692, ENSMUSG00000044786,…
68	Downregulated	4.14e-09	61	384	2.53994	Response to virus	http://amigo.geneontology.org/amigo/term/GO:0009615	ENSMUSG00000020641, ENSMUSG00000020823, ENSMUSG00000025491, ENSMUSG00000025492, ENSMUSG00000026896, ENSMUSG00000027843, ENSMUSG00000029561, ENSMUSG00000032661, ENSMUSG00000034459, ENSMUSG00000035208, ENSMUSG00000037921, ENSMUSG00000040296, ENSMUSG00000041827, ENSMUSG00000046718, ENSMUSG00000052776, ENSMUSG00000062488, ENSMUSG00000066800, ENSMUSG00000074896, ENSMUSG00000035042, ENSMUSG00000000275,…
69	Downregulated	4.56e-09	220	2206	1.53226	Cell death	http://amigo.geneontology.org/amigo/term/GO:0008219	ENSMUSG00000003812, ENSMUSG00000008730, ENSMUSG00000010751, ENSMUSG00000020108, ENSMUSG00000020205, ENSMUSG00000022144, ENSMUSG00000022270, ENSMUSG00000022564, ENSMUSG00000022575, ENSMUSG00000022812, ENSMUSG00000023010, ENSMUSG00000027381, ENSMUSG00000027859, ENSMUSG00000028191, ENSMUSG00000028599, ENSMUSG00000028756, ENSMUSG00000030330, ENSMUSG00000031770, ENSMUSG00000032060, ENSMUSG00000036986,…
70	Downregulated	4.56e-09	187	1735	1.60585	Positive regulation of transcription DNA-templated	http://amigo.geneontology.org/amigo/term/GO:0045893	ENSMUSG00000001288, ENSMUSG00000002028, ENSMUSG00000002250, ENSMUSG00000003119, ENSMUSG00000006932, ENSMUSG00000007880, ENSMUSG00000020889, ENSMUSG00000022463, ENSMUSG00000022974, ENSMUSG00000023055, ENSMUSG00000024052, ENSMUSG00000024826, ENSMUSG00000025066, ENSMUSG00000026571, ENSMUSG00000027803, ENSMUSG00000028211, ENSMUSG00000030557, ENSMUSG00000031925, ENSMUSG00000034341, ENSMUSG00000034832,…
71	Downregulated	4.56e-09	217	2094	1.53756	Organic substance catabolic process	http://amigo.geneontology.org/amigo/term/GO:1901575	ENSMUSG00000000326, ENSMUSG00000001924, ENSMUSG00000003123, ENSMUSG00000003812, ENSMUSG00000005413, ENSMUSG00000006127, ENSMUSG00000006345, ENSMUSG00000008348, ENSMUSG00000014905, ENSMUSG00000015806, ENSMUSG00000020964, ENSMUSG00000021179, ENSMUSG00000021240, ENSMUSG00000021477, ENSMUSG00000021794, ENSMUSG00000021838, ENSMUSG00000021939, ENSMUSG00000022216, ENSMUSG00000022425, ENSMUSG00000022453,…
72	Downregulated	4.56e-09	187	1735	1.60585	Positive regulation of nucleic acid-templated transcription	http://amigo.geneontology.org/amigo/term/GO:1903508	ENSMUSG00000001288, ENSMUSG00000002028, ENSMUSG00000002250, ENSMUSG00000003119, ENSMUSG00000006932, ENSMUSG00000007880, ENSMUSG00000020889, ENSMUSG00000022463, ENSMUSG00000022974, ENSMUSG00000023055, ENSMUSG00000024052, ENSMUSG00000024826, ENSMUSG00000025066, ENSMUSG00000026571, ENSMUSG00000027803, ENSMUSG00000028211, ENSMUSG00000030557, ENSMUSG00000031925, ENSMUSG00000034341, ENSMUSG00000034832,…
73	Downregulated	5.28e-09	152	1528	1.70742	Response to biotic stimulus	http://amigo.geneontology.org/amigo/term/GO:0009607	ENSMUSG00000002983, ENSMUSG00000020641, ENSMUSG00000020823, ENSMUSG00000022575, ENSMUSG00000022971, ENSMUSG00000024457, ENSMUSG00000024927, ENSMUSG00000025491, ENSMUSG00000025492, ENSMUSG00000026896, ENSMUSG00000027514, ENSMUSG00000027843, ENSMUSG00000028268, ENSMUSG00000028270, ENSMUSG00000029371, ENSMUSG00000029380, ENSMUSG00000029561, ENSMUSG00000030921, ENSMUSG00000032508, ENSMUSG00000032661,…
74	Downregulated	5.42e-09	187	1741	1.59974	Positive regulation of RNA biosynthetic process	http://amigo.geneontology.org/amigo/term/GO:1902680	ENSMUSG00000001288, ENSMUSG00000002028, ENSMUSG00000002250, ENSMUSG00000003119, ENSMUSG00000006932, ENSMUSG00000007880, ENSMUSG00000020889, ENSMUSG00000022463, ENSMUSG00000022974, ENSMUSG00000023055, ENSMUSG00000024052, ENSMUSG00000024826, ENSMUSG00000025066, ENSMUSG00000026571, ENSMUSG00000027803, ENSMUSG00000028211, ENSMUSG00000030557, ENSMUSG00000031925, ENSMUSG00000034341, ENSMUSG00000034832,…
75	Downregulated	5.52e-09	48	241	2.87805	Intracellular receptor signaling pathway	http://amigo.geneontology.org/amigo/term/GO:0030522	ENSMUSG00000001288, ENSMUSG00000014763, ENSMUSG00000020823, ENSMUSG00000027843, ENSMUSG00000032194, ENSMUSG00000042625, ENSMUSG00000066026, ENSMUSG00000071054, ENSMUSG00000021025, ENSMUSG00000023055, ENSMUSG00000029416, ENSMUSG00000035799, ENSMUSG00000051316, ENSMUSG00000002250, ENSMUSG00000002307, ENSMUSG00000004040, ENSMUSG00000007817, ENSMUSG00000007880, ENSMUSG00000015522, ENSMUSG00000020889,…
76	Downregulated	5.52e-09	345	3869	1.36491	Regulation of response to stimulus	http://amigo.geneontology.org/amigo/term/GO:0048583	ENSMUSG00000001518, ENSMUSG00000001964, ENSMUSG00000002250, ENSMUSG00000002603, ENSMUSG00000003228, ENSMUSG00000004221, ENSMUSG00000006127, ENSMUSG00000006345, ENSMUSG00000017493, ENSMUSG00000019842, ENSMUSG00000020108, ENSMUSG00000020641, ENSMUSG00000020823, ENSMUSG00000022505, ENSMUSG00000022564, ENSMUSG00000022812, ENSMUSG00000023010, ENSMUSG00000023046, ENSMUSG00000023951, ENSMUSG00000024083,…
77	Downregulated	5.81e-09	218	2124	1.52859	Positive regulation of biosynthetic process	http://amigo.geneontology.org/amigo/term/GO:0009891	ENSMUSG00000001288, ENSMUSG00000002028, ENSMUSG00000002250, ENSMUSG00000003119, ENSMUSG00000006932, ENSMUSG00000007880, ENSMUSG00000020889, ENSMUSG00000022463, ENSMUSG00000022974, ENSMUSG00000023055, ENSMUSG00000024052, ENSMUSG00000024826, ENSMUSG00000025066, ENSMUSG00000026571, ENSMUSG00000027803, ENSMUSG00000028211, ENSMUSG00000030557, ENSMUSG00000031925, ENSMUSG00000034341, ENSMUSG00000034832,…
78	Downregulated	6.53e-09	142	1267	1.73681	Cellular response to oxygen-containing compound	http://amigo.geneontology.org/amigo/term/GO:1901701	ENSMUSG00000004040, ENSMUSG00000005161, ENSMUSG00000006127, ENSMUSG00000022812, ENSMUSG00000024052, ENSMUSG00000026826, ENSMUSG00000028062, ENSMUSG00000028646, ENSMUSG00000028893, ENSMUSG00000029371, ENSMUSG00000029380, ENSMUSG00000030842, ENSMUSG00000031513, ENSMUSG00000032192, ENSMUSG00000032194, ENSMUSG00000034855, ENSMUSG00000038894, ENSMUSG00000040618, ENSMUSG00000045294, ENSMUSG00000048490,…
79	Downregulated	8.14e-09	213	2073	1.53174	Positive regulation of cellular biosynthetic process	http://amigo.geneontology.org/amigo/term/GO:0031328	ENSMUSG00000001288, ENSMUSG00000002028, ENSMUSG00000002250, ENSMUSG00000003119, ENSMUSG00000006932, ENSMUSG00000007880, ENSMUSG00000020889, ENSMUSG00000022463, ENSMUSG00000022974, ENSMUSG00000023055, ENSMUSG00000024052, ENSMUSG00000024826, ENSMUSG00000025066, ENSMUSG00000026571, ENSMUSG00000027803, ENSMUSG00000028211, ENSMUSG00000030557, ENSMUSG00000031925, ENSMUSG00000034341, ENSMUSG00000034832,…
80	Downregulated	8.38e-09	185	1825	1.59273	Response to oxygen-containing compound	http://amigo.geneontology.org/amigo/term/GO:1901700	ENSMUSG00000004040, ENSMUSG00000005161, ENSMUSG00000006127, ENSMUSG00000022812, ENSMUSG00000024052, ENSMUSG00000025203, ENSMUSG00000026826, ENSMUSG00000027187, ENSMUSG00000028062, ENSMUSG00000028646, ENSMUSG00000028893, ENSMUSG00000029371, ENSMUSG00000029380, ENSMUSG00000030104, ENSMUSG00000030842, ENSMUSG00000031513, ENSMUSG00000032192, ENSMUSG00000032194, ENSMUSG00000034855, ENSMUSG00000037071,…
81	Downregulated	1.05e-08	147	1485	1.70374	Response to other organism	http://amigo.geneontology.org/amigo/term/GO:0051707	ENSMUSG00000002983, ENSMUSG00000020641, ENSMUSG00000020823, ENSMUSG00000022575, ENSMUSG00000022971, ENSMUSG00000024457, ENSMUSG00000024927, ENSMUSG00000025491, ENSMUSG00000025492, ENSMUSG00000026896, ENSMUSG00000027514, ENSMUSG00000027843, ENSMUSG00000028268, ENSMUSG00000028270, ENSMUSG00000029371, ENSMUSG00000029380, ENSMUSG00000029561, ENSMUSG00000030921, ENSMUSG00000032508, ENSMUSG00000032661,…
82	Downregulated	1.08e-08	205	1909	1.5416	Cellular response to stress	http://amigo.geneontology.org/amigo/term/GO:0033554	ENSMUSG00000001924, ENSMUSG00000002948, ENSMUSG00000005161, ENSMUSG00000008429, ENSMUSG00000008730, ENSMUSG00000014905, ENSMUSG00000015839, ENSMUSG00000020964, ENSMUSG00000023010, ENSMUSG00000023944, ENSMUSG00000024190, ENSMUSG00000024359, ENSMUSG00000025066, ENSMUSG00000026637, ENSMUSG00000026648, ENSMUSG00000027843, ENSMUSG00000028599, ENSMUSG00000028646, ENSMUSG00000028893, ENSMUSG00000030094,…
83	Downregulated	1.12e-08	147	1489	1.70082	Response to external biotic stimulus	http://amigo.geneontology.org/amigo/term/GO:0043207	ENSMUSG00000002983, ENSMUSG00000020641, ENSMUSG00000020823, ENSMUSG00000022575, ENSMUSG00000022971, ENSMUSG00000024457, ENSMUSG00000024927, ENSMUSG00000025491, ENSMUSG00000025492, ENSMUSG00000026896, ENSMUSG00000027514, ENSMUSG00000027843, ENSMUSG00000028268, ENSMUSG00000028270, ENSMUSG00000029371, ENSMUSG00000029380, ENSMUSG00000029561, ENSMUSG00000030921, ENSMUSG00000032508, ENSMUSG00000032661,…
84	Downregulated	1.27e-08	203	1954	1.54203	Positive regulation of macromolecule biosynthetic process	http://amigo.geneontology.org/amigo/term/GO:0010557	ENSMUSG00000001288, ENSMUSG00000002028, ENSMUSG00000002250, ENSMUSG00000003119, ENSMUSG00000006932, ENSMUSG00000007880, ENSMUSG00000020889, ENSMUSG00000022463, ENSMUSG00000022974, ENSMUSG00000023055, ENSMUSG00000024052, ENSMUSG00000024826, ENSMUSG00000025066, ENSMUSG00000026571, ENSMUSG00000027803, ENSMUSG00000028211, ENSMUSG00000030557, ENSMUSG00000031925, ENSMUSG00000034341, ENSMUSG00000034832,…
85	Downregulated	1.3e-08	112	1083	1.8631	Defense response to other organism	http://amigo.geneontology.org/amigo/term/GO:0098542	ENSMUSG00000002983, ENSMUSG00000020641, ENSMUSG00000020823, ENSMUSG00000022575, ENSMUSG00000022971, ENSMUSG00000024457, ENSMUSG00000024927, ENSMUSG00000025491, ENSMUSG00000025492, ENSMUSG00000026896, ENSMUSG00000027514, ENSMUSG00000027843, ENSMUSG00000028268, ENSMUSG00000028270, ENSMUSG00000029561, ENSMUSG00000030921, ENSMUSG00000032508, ENSMUSG00000032661, ENSMUSG00000034459, ENSMUSG00000035042,…
86	Downregulated	1.35e-08	314	3415	1.38119	Positive regulation of cellular metabolic process	http://amigo.geneontology.org/amigo/term/GO:0031325	ENSMUSG00000001288, ENSMUSG00000002028, ENSMUSG00000002250, ENSMUSG00000002603, ENSMUSG00000003119, ENSMUSG00000006932, ENSMUSG00000007880, ENSMUSG00000019907, ENSMUSG00000020889, ENSMUSG00000021838, ENSMUSG00000022216, ENSMUSG00000022463, ENSMUSG00000022974, ENSMUSG00000023055, ENSMUSG00000023951, ENSMUSG00000024052, ENSMUSG00000024425, ENSMUSG00000024594, ENSMUSG00000024826, ENSMUSG00000024962,…
87	Downregulated	1.36e-08	203	2026	1.53943	Programmed cell death	http://amigo.geneontology.org/amigo/term/GO:0012501	ENSMUSG00000003812, ENSMUSG00000008730, ENSMUSG00000010751, ENSMUSG00000020108, ENSMUSG00000020205, ENSMUSG00000022144, ENSMUSG00000022270, ENSMUSG00000022564, ENSMUSG00000022575, ENSMUSG00000022812, ENSMUSG00000023010, ENSMUSG00000027381, ENSMUSG00000027859, ENSMUSG00000028191, ENSMUSG00000028599, ENSMUSG00000028756, ENSMUSG00000030330, ENSMUSG00000031770, ENSMUSG00000032060, ENSMUSG00000036986,…
88	Downregulated	1.67e-08	153	1363	1.66729	Regulation of response to stress	http://amigo.geneontology.org/amigo/term/GO:0080134	ENSMUSG00000002250, ENSMUSG00000006345, ENSMUSG00000020823, ENSMUSG00000024190, ENSMUSG00000026072, ENSMUSG00000026637, ENSMUSG00000027514, ENSMUSG00000027843, ENSMUSG00000028599, ENSMUSG00000031770, ENSMUSG00000033538, ENSMUSG00000034708, ENSMUSG00000037613, ENSMUSG00000037855, ENSMUSG00000045294, ENSMUSG00000047881, ENSMUSG00000055447, ENSMUSG00000062300, ENSMUSG00000090272, ENSMUSG00000007880,…
89	Downregulated	1.81e-08	155	1362	1.65827	Macromolecule catabolic process	http://amigo.geneontology.org/amigo/term/GO:0009057	ENSMUSG00000001924, ENSMUSG00000003812, ENSMUSG00000008348, ENSMUSG00000014905, ENSMUSG00000020964, ENSMUSG00000021179, ENSMUSG00000021477, ENSMUSG00000021838, ENSMUSG00000021939, ENSMUSG00000022216, ENSMUSG00000024425, ENSMUSG00000024589, ENSMUSG00000025135, ENSMUSG00000027078, ENSMUSG00000027086, ENSMUSG00000027272, ENSMUSG00000027580, ENSMUSG00000028437, ENSMUSG00000028599, ENSMUSG00000028932,…
90	Downregulated	1.86e-08	152	1580	1.66716	Immune response	http://amigo.geneontology.org/amigo/term/GO:0006955	ENSMUSG00000002983, ENSMUSG00000019842, ENSMUSG00000020641, ENSMUSG00000020823, ENSMUSG00000021477, ENSMUSG00000022971, ENSMUSG00000024308, ENSMUSG00000024457, ENSMUSG00000024927, ENSMUSG00000025491, ENSMUSG00000025492, ENSMUSG00000026896, ENSMUSG00000027514, ENSMUSG00000027843, ENSMUSG00000028037, ENSMUSG00000028191, ENSMUSG00000028268, ENSMUSG00000028270, ENSMUSG00000028599, ENSMUSG00000029371,…
91	Downregulated	2.05e-08	158	1643	1.64472	Biological process involved in interspecies interaction between organisms	http://amigo.geneontology.org/amigo/term/GO:0044419	ENSMUSG00000002983, ENSMUSG00000020641, ENSMUSG00000020823, ENSMUSG00000022575, ENSMUSG00000022971, ENSMUSG00000024457, ENSMUSG00000024927, ENSMUSG00000025491, ENSMUSG00000025492, ENSMUSG00000026896, ENSMUSG00000027514, ENSMUSG00000027843, ENSMUSG00000028268, ENSMUSG00000028270, ENSMUSG00000029371, ENSMUSG00000029380, ENSMUSG00000029561, ENSMUSG00000030921, ENSMUSG00000032508, ENSMUSG00000032661,…
92	Downregulated	2.14e-08	113	986	1.83671	Response to lipid	http://amigo.geneontology.org/amigo/term/GO:0033993	ENSMUSG00000002250, ENSMUSG00000025203, ENSMUSG00000029371, ENSMUSG00000029380, ENSMUSG00000032194, ENSMUSG00000034855, ENSMUSG00000037071, ENSMUSG00000040618, ENSMUSG00000042625, ENSMUSG00000045294, ENSMUSG00000048490, ENSMUSG00000051439, ENSMUSG00000071054, ENSMUSG00000000567, ENSMUSG00000003032, ENSMUSG00000015243, ENSMUSG00000018774, ENSMUSG00000020108, ENSMUSG00000020638, ENSMUSG00000021025,…
93	Downregulated	2.19e-08	119	933	1.80181	Regulation of catabolic process	http://amigo.geneontology.org/amigo/term/GO:0009894	ENSMUSG00000021179, ENSMUSG00000021838, ENSMUSG00000022216, ENSMUSG00000024589, ENSMUSG00000027086, ENSMUSG00000028599, ENSMUSG00000028646, ENSMUSG00000028893, ENSMUSG00000028954, ENSMUSG00000029647, ENSMUSG00000030921, ENSMUSG00000031770, ENSMUSG00000032216, ENSMUSG00000032501, ENSMUSG00000032715, ENSMUSG00000035242, ENSMUSG00000039168, ENSMUSG00000042677, ENSMUSG00000047888, ENSMUSG00000050148,…
94	Downregulated	2.58e-08	400	4947	1.3022	Regulation of gene expression	http://amigo.geneontology.org/amigo/term/GO:0010468	ENSMUSG00000000085, ENSMUSG00000000567, ENSMUSG00000001288, ENSMUSG00000001911, ENSMUSG00000002028, ENSMUSG00000002227, ENSMUSG00000002250, ENSMUSG00000002325, ENSMUSG00000002983, ENSMUSG00000003032, ENSMUSG00000003119, ENSMUSG00000003545, ENSMUSG00000003847, ENSMUSG00000004040, ENSMUSG00000004151, ENSMUSG00000005148, ENSMUSG00000006932, ENSMUSG00000007670, ENSMUSG00000007817, ENSMUSG00000007880,…
95	Downregulated	2.78e-08	197	1972	1.53624	Apoptotic process	http://amigo.geneontology.org/amigo/term/GO:0006915	ENSMUSG00000003812, ENSMUSG00000008730, ENSMUSG00000010751, ENSMUSG00000020108, ENSMUSG00000020205, ENSMUSG00000022144, ENSMUSG00000022270, ENSMUSG00000022564, ENSMUSG00000022812, ENSMUSG00000023010, ENSMUSG00000027381, ENSMUSG00000027859, ENSMUSG00000028191, ENSMUSG00000028599, ENSMUSG00000028756, ENSMUSG00000030330, ENSMUSG00000031770, ENSMUSG00000032060, ENSMUSG00000036986, ENSMUSG00000037148,…
96	Downregulated	2.91e-08	182	1803	1.5689	Regulation of cell death	http://amigo.geneontology.org/amigo/term/GO:0010941	ENSMUSG00000010751, ENSMUSG00000020205, ENSMUSG00000022144, ENSMUSG00000022270, ENSMUSG00000022564, ENSMUSG00000023010, ENSMUSG00000027381, ENSMUSG00000027859, ENSMUSG00000028191, ENSMUSG00000028599, ENSMUSG00000028756, ENSMUSG00000030330, ENSMUSG00000031770, ENSMUSG00000032060, ENSMUSG00000037148, ENSMUSG00000037613, ENSMUSG00000038612, ENSMUSG00000054568, ENSMUSG00000078485, ENSMUSG00000008958,…
97	Downregulated	3.42e-08	320	3791	1.36185	Regulation of RNA metabolic process	http://amigo.geneontology.org/amigo/term/GO:0051252	ENSMUSG00000000085, ENSMUSG00000000567, ENSMUSG00000001288, ENSMUSG00000001911, ENSMUSG00000002028, ENSMUSG00000002250, ENSMUSG00000002325, ENSMUSG00000002983, ENSMUSG00000003032, ENSMUSG00000003119, ENSMUSG00000003545, ENSMUSG00000003847, ENSMUSG00000004040, ENSMUSG00000004151, ENSMUSG00000005148, ENSMUSG00000006932, ENSMUSG00000007817, ENSMUSG00000007880, ENSMUSG00000008575, ENSMUSG00000009741,…
98	Downregulated	4.5e-08	120	997	1.77317	Negative regulation of gene expression	http://amigo.geneontology.org/amigo/term/GO:0010629	ENSMUSG00000002227, ENSMUSG00000020300, ENSMUSG00000020721, ENSMUSG00000021179, ENSMUSG00000021585, ENSMUSG00000021838, ENSMUSG00000023010, ENSMUSG00000027086, ENSMUSG00000027580, ENSMUSG00000027843, ENSMUSG00000028842, ENSMUSG00000029647, ENSMUSG00000030213, ENSMUSG00000031490, ENSMUSG00000032712, ENSMUSG00000034422, ENSMUSG00000036698, ENSMUSG00000039501, ENSMUSG00000039652, ENSMUSG00000042677,…
99	Downregulated	8.86e-08	148	1430	1.64063	Regulation of immune system process	http://amigo.geneontology.org/amigo/term/GO:0002682	ENSMUSG00000006345, ENSMUSG00000020641, ENSMUSG00000020823, ENSMUSG00000023951, ENSMUSG00000024308, ENSMUSG00000024962, ENSMUSG00000027514, ENSMUSG00000027843, ENSMUSG00000028599, ENSMUSG00000029810, ENSMUSG00000031639, ENSMUSG00000035042, ENSMUSG00000037922, ENSMUSG00000051439, ENSMUSG00000052085, ENSMUSG00000062300, ENSMUSG00000090272, ENSMUSG00000007880, ENSMUSG00000022387, ENSMUSG00000021025,…
100	Downregulated	9e-08	170	1652	1.57517	Response to endogenous stimulus	http://amigo.geneontology.org/amigo/term/GO:0009719	ENSMUSG00000001288, ENSMUSG00000002250, ENSMUSG00000002603, ENSMUSG00000004040, ENSMUSG00000005514, ENSMUSG00000006127, ENSMUSG00000020889, ENSMUSG00000022812, ENSMUSG00000024052, ENSMUSG00000024427, ENSMUSG00000024515, ENSMUSG00000026826, ENSMUSG00000027859, ENSMUSG00000028062, ENSMUSG00000028646, ENSMUSG00000028893, ENSMUSG00000030842, ENSMUSG00000031513, ENSMUSG00000032192, ENSMUSG00000032194,…

## Sheet: LANTA KEEG overrepresentation
	group	FDR	nGenes	Pathway size	Fold enriched	Pathway	URL	Genes
1	Upregulated	1.28e-18	46	130	4.90402	Ribosome	http://www.genome.jp/kegg-bin/show_pathway?mmu03010	ENSMUSG00000058558, ENSMUSG00000026087, ENSMUSG00000073702, ENSMUSG00000032518, ENSMUSG00000041453, ENSMUSG00000028936, ENSMUSG00000060938, ENSMUSG00000079435, ENSMUSG00000043716, ENSMUSG00000024608, ENSMUSG00000063457, ENSMUSG00000061787, ENSMUSG00000040952, ENSMUSG00000025290, ENSMUSG00000031320, ENSMUSG00000061477, ENSMUSG00000074129, ENSMUSG00000090137, ENSMUSG00000032215, ENSMUSG00000046364,…
2	Upregulated	6.17e-15	41	131	4.44091	Spliceosome	http://www.genome.jp/kegg-bin/show_pathway?mmu03040	ENSMUSG00000029817, ENSMUSG00000040824, ENSMUSG00000018379, ENSMUSG00000028609, ENSMUSG00000071172, ENSMUSG00000022858, ENSMUSG00000020929, ENSMUSG00000008333, ENSMUSG00000002477, ENSMUSG00000063480, ENSMUSG00000021500, ENSMUSG00000025134, ENSMUSG00000024097, ENSMUSG00000024287, ENSMUSG00000063800, ENSMUSG00000024735, ENSMUSG00000037475, ENSMUSG00000028330, ENSMUSG00000031848, ENSMUSG00000027998,…
3	Upregulated	4.09e-10	33	133	3.8188	Oxidative phosphorylation	http://www.genome.jp/kegg-bin/show_pathway?mmu00190	ENSMUSG00000025781, ENSMUSG00000022890, ENSMUSG00000050856, ENSMUSG00000014313, ENSMUSG00000032330, ENSMUSG00000063694, ENSMUSG00000064351, ENSMUSG00000064370, ENSMUSG00000064341, ENSMUSG00000064345, ENSMUSG00000064363, ENSMUSG00000064367, ENSMUSG00000064368, ENSMUSG00000014294, ENSMUSG00000021764, ENSMUSG00000059734, ENSMUSG00000025968, ENSMUSG00000038690, ENSMUSG00000027673, ENSMUSG00000031231,…
4	Upregulated	4.09e-10	50	262	2.84441	Parkinson disease	http://www.genome.jp/kegg-bin/show_pathway?mmu05012	ENSMUSG00000025781, ENSMUSG00000022890, ENSMUSG00000036438, ENSMUSG00000019370, ENSMUSG00000014313, ENSMUSG00000032330, ENSMUSG00000063694, ENSMUSG00000021116, ENSMUSG00000032562, ENSMUSG00000064351, ENSMUSG00000064370, ENSMUSG00000064341, ENSMUSG00000064345, ENSMUSG00000064363, ENSMUSG00000064367, ENSMUSG00000064368, ENSMUSG00000014294, ENSMUSG00000021764, ENSMUSG00000015671, ENSMUSG00000060073,…
5	Upregulated	4.09e-10	62	365	2.48355	Amyotrophic lateral sclerosis	http://www.genome.jp/kegg-bin/show_pathway?mmu05014	ENSMUSG00000052798, ENSMUSG00000025781, ENSMUSG00000022890, ENSMUSG00000014313, ENSMUSG00000032330, ENSMUSG00000063694, ENSMUSG00000021116, ENSMUSG00000037236, ENSMUSG00000064351, ENSMUSG00000064370, ENSMUSG00000064341, ENSMUSG00000064345, ENSMUSG00000064363, ENSMUSG00000064367, ENSMUSG00000064368, ENSMUSG00000014294, ENSMUSG00000021764, ENSMUSG00000109511, ENSMUSG00000015671, ENSMUSG00000060073,…
6	Upregulated	1.75e-08	29	115	3.66955	Nucleocytoplasmic transport	http://www.genome.jp/kegg-bin/show_pathway?mmu03013	ENSMUSG00000052798, ENSMUSG00000020290, ENSMUSG00000002718, ENSMUSG00000001440, ENSMUSG00000027782, ENSMUSG00000028609, ENSMUSG00000109511, ENSMUSG00000020994, ENSMUSG00000022391, ENSMUSG00000025134, ENSMUSG00000021374, ENSMUSG00000026021, ENSMUSG00000024287, ENSMUSG00000026491, ENSMUSG00000043241, ENSMUSG00000037475, ENSMUSG00000028330, ENSMUSG00000020739, ENSMUSG00000038374, ENSMUSG00000022100,…
7	Upregulated	6.45e-08	23	78	4.15207	Ribosome biogenesis in eukaryotes	http://www.genome.jp/kegg-bin/show_pathway?mmu03008	ENSMUSG00000032288, ENSMUSG00000020290, ENSMUSG00000032026, ENSMUSG00000022191, ENSMUSG00000046865, ENSMUSG00000063480, ENSMUSG00000021418, ENSMUSG00000035575, ENSMUSG00000028869, ENSMUSG00000051062, ENSMUSG00000031403, ENSMUSG00000033285, ENSMUSG00000026127, ENSMUSG00000042354, ENSMUSG00000001056, ENSMUSG00000024800, ENSMUSG00000026020, ENSMUSG00000027133, ENSMUSG00000022325, ENSMUSG00000030521,…
8	Upregulated	6.45e-08	42	228	2.69504	Thermogenesis	http://www.genome.jp/kegg-bin/show_pathway?mmu04714	ENSMUSG00000030546, ENSMUSG00000025781, ENSMUSG00000022890, ENSMUSG00000050856, ENSMUSG00000014313, ENSMUSG00000032330, ENSMUSG00000064351, ENSMUSG00000064370, ENSMUSG00000064341, ENSMUSG00000064345, ENSMUSG00000064363, ENSMUSG00000064367, ENSMUSG00000064368, ENSMUSG00000014294, ENSMUSG00000021764, ENSMUSG00000067713, ENSMUSG00000029334, ENSMUSG00000032481, ENSMUSG00000078572, ENSMUSG00000059734,…
9	Upregulated	8.18e-08	15	35	6.15426	DNA replication	http://www.genome.jp/kegg-bin/show_pathway?mmu03030	ENSMUSG00000056394, ENSMUSG00000041859, ENSMUSG00000002870, ENSMUSG00000005410, ENSMUSG00000027342, ENSMUSG00000006678, ENSMUSG00000038644, ENSMUSG00000020471, ENSMUSG00000025395, ENSMUSG00000029191, ENSMUSG00000029911, ENSMUSG00000028394, ENSMUSG00000021932, ENSMUSG00000024925, ENSMUSG00000052926
10	Upregulated	1.57e-07	49	300	2.38644	Huntington disease	http://www.genome.jp/kegg-bin/show_pathway?mmu05016	ENSMUSG00000025781, ENSMUSG00000022890, ENSMUSG00000014313, ENSMUSG00000032330, ENSMUSG00000063694, ENSMUSG00000019777, ENSMUSG00000064351, ENSMUSG00000064370, ENSMUSG00000064341, ENSMUSG00000064345, ENSMUSG00000064363, ENSMUSG00000064367, ENSMUSG00000064368, ENSMUSG00000045996, ENSMUSG00000014294, ENSMUSG00000021764, ENSMUSG00000015671, ENSMUSG00000060073, ENSMUSG00000014769, ENSMUSG00000002102,…
11	Upregulated	5.05e-07	44	266	2.43156	Prion disease	http://www.genome.jp/kegg-bin/show_pathway?mmu05020	ENSMUSG00000025781, ENSMUSG00000022890, ENSMUSG00000000058, ENSMUSG00000014313, ENSMUSG00000032330, ENSMUSG00000063694, ENSMUSG00000021116, ENSMUSG00000064351, ENSMUSG00000064370, ENSMUSG00000064341, ENSMUSG00000064345, ENSMUSG00000064363, ENSMUSG00000064367, ENSMUSG00000064368, ENSMUSG00000014294, ENSMUSG00000021764, ENSMUSG00000015671, ENSMUSG00000060073, ENSMUSG00000014769, ENSMUSG00000002102,…
12	Upregulated	8.55e-06	26	125	2.95818	Cell cycle	http://www.genome.jp/kegg-bin/show_pathway?mmu04110	ENSMUSG00000027715, ENSMUSG00000028212, ENSMUSG00000019942, ENSMUSG00000032113, ENSMUSG00000024974, ENSMUSG00000027490, ENSMUSG00000019777, ENSMUSG00000041859, ENSMUSG00000002870, ENSMUSG00000005410, ENSMUSG00000026037, ENSMUSG00000027342, ENSMUSG00000027641, ENSMUSG00000020687, ENSMUSG00000038379, ENSMUSG00000021453, ENSMUSG00000018983, ENSMUSG00000032409, ENSMUSG00000041431, ENSMUSG00000029686,…
13	Upregulated	6.19e-05	35	235	2.27826	Coronavirus disease-COVID-19	http://www.genome.jp/kegg-bin/show_pathway?mmu05171	ENSMUSG00000058558, ENSMUSG00000073702, ENSMUSG00000032518, ENSMUSG00000041453, ENSMUSG00000028936, ENSMUSG00000060938, ENSMUSG00000079435, ENSMUSG00000043716, ENSMUSG00000024608, ENSMUSG00000063457, ENSMUSG00000061787, ENSMUSG00000040952, ENSMUSG00000025290, ENSMUSG00000031320, ENSMUSG00000061477, ENSMUSG00000074129, ENSMUSG00000090137, ENSMUSG00000032215, ENSMUSG00000046364, ENSMUSG00000008683,…
14	Upregulated	0.000209	31	204	2.28109	Diabetic cardiomyopathy	http://www.genome.jp/kegg-bin/show_pathway?mmu05415	ENSMUSG00000025781, ENSMUSG00000022890, ENSMUSG00000014313, ENSMUSG00000032330, ENSMUSG00000057666, ENSMUSG00000064351, ENSMUSG00000064370, ENSMUSG00000064341, ENSMUSG00000064345, ENSMUSG00000064363, ENSMUSG00000064367, ENSMUSG00000064368, ENSMUSG00000014294, ENSMUSG00000021764, ENSMUSG00000040385, ENSMUSG00000059734, ENSMUSG00000025968, ENSMUSG00000027673, ENSMUSG00000031231, ENSMUSG00000059534,…
15	Upregulated	0.000212	48	380	1.88374	Alzheimer disease	http://www.genome.jp/kegg-bin/show_pathway?mmu05010	ENSMUSG00000025781, ENSMUSG00000022890, ENSMUSG00000036438, ENSMUSG00000019370, ENSMUSG00000014313, ENSMUSG00000032330, ENSMUSG00000063694, ENSMUSG00000021116, ENSMUSG00000057666, ENSMUSG00000064351, ENSMUSG00000064370, ENSMUSG00000064341, ENSMUSG00000064345, ENSMUSG00000064363, ENSMUSG00000064367, ENSMUSG00000064368, ENSMUSG00000014294, ENSMUSG00000021764, ENSMUSG00000015671, ENSMUSG00000060073,…
16	Upregulated	0.000846	8	22	5.41575	Mismatch repair	http://www.genome.jp/kegg-bin/show_pathway?mmu03430	ENSMUSG00000056394, ENSMUSG00000032498, ENSMUSG00000027342, ENSMUSG00000079109, ENSMUSG00000038644, ENSMUSG00000020471, ENSMUSG00000029191, ENSMUSG00000029911
17	Upregulated	0.0013	54	469	1.68462	Pathways of neurodegeneration-multiple diseases	http://www.genome.jp/kegg-bin/show_pathway?mmu05022	ENSMUSG00000025781, ENSMUSG00000022890, ENSMUSG00000036438, ENSMUSG00000019370, ENSMUSG00000014313, ENSMUSG00000032330, ENSMUSG00000063694, ENSMUSG00000021116, ENSMUSG00000064351, ENSMUSG00000064370, ENSMUSG00000064341, ENSMUSG00000064345, ENSMUSG00000064363, ENSMUSG00000064367, ENSMUSG00000064368, ENSMUSG00000014294, ENSMUSG00000021764, ENSMUSG00000015671, ENSMUSG00000060073, ENSMUSG00000014769,…
18	Upregulated	0.00139	12	56	3.53201	Pyrimidine metabolism	http://www.genome.jp/kegg-bin/show_pathway?mmu00240	ENSMUSG00000029780, ENSMUSG00000037601, ENSMUSG00000030978, ENSMUSG00000025574, ENSMUSG00000025747, ENSMUSG00000022814, ENSMUSG00000031730, ENSMUSG00000028443, ENSMUSG00000042462, ENSMUSG00000017176, ENSMUSG00000000295, ENSMUSG00000026558
19	Upregulated	0.00164	24	154	2.27234	Non-alcoholic fatty liver disease	http://www.genome.jp/kegg-bin/show_pathway?mmu04932	ENSMUSG00000014313, ENSMUSG00000032330, ENSMUSG00000063694, ENSMUSG00000021116, ENSMUSG00000064351, ENSMUSG00000064370, ENSMUSG00000014294, ENSMUSG00000021764, ENSMUSG00000067713, ENSMUSG00000059734, ENSMUSG00000025968, ENSMUSG00000027673, ENSMUSG00000031231, ENSMUSG00000059534, ENSMUSG00000026032, ENSMUSG00000063882, ENSMUSG00000033938, ENSMUSG00000025204, ENSMUSG00000021520, ENSMUSG00000030647,…
20	Upregulated	0.00303	9	32	4.06181	RNA polymerase	http://www.genome.jp/kegg-bin/show_pathway?mmu03020	ENSMUSG00000045996, ENSMUSG00000029250, ENSMUSG00000030880, ENSMUSG00000028318, ENSMUSG00000038628, ENSMUSG00000035834, ENSMUSG00000024258, ENSMUSG00000033020, ENSMUSG00000047649
21	Upregulated	0.00353	11	47	3.38484	Proteasome	http://www.genome.jp/kegg-bin/show_pathway?mmu03050	ENSMUSG00000015671, ENSMUSG00000060073, ENSMUSG00000014769, ENSMUSG00000002102, ENSMUSG00000025487, ENSMUSG00000030751, ENSMUSG00000032301, ENSMUSG00000021737, ENSMUSG00000029649, ENSMUSG00000020720, ENSMUSG00000021832
22	Upregulated	0.00513	10	41	3.47163	Homologous recombination	http://www.genome.jp/kegg-bin/show_pathway?mmu03440	ENSMUSG00000017146, ENSMUSG00000038644, ENSMUSG00000020471, ENSMUSG00000018841, ENSMUSG00000025878, ENSMUSG00000031201, ENSMUSG00000041238, ENSMUSG00000034329, ENSMUSG00000028224, ENSMUSG00000029911
23	Upregulated	0.00547	29	220	1.92471	Chemical carcinogenesis-reactive oxygen species	http://www.genome.jp/kegg-bin/show_pathway?mmu05208	ENSMUSG00000025781, ENSMUSG00000022890, ENSMUSG00000014313, ENSMUSG00000032330, ENSMUSG00000064351, ENSMUSG00000064370, ENSMUSG00000064341, ENSMUSG00000064345, ENSMUSG00000064363, ENSMUSG00000064367, ENSMUSG00000064368, ENSMUSG00000014294, ENSMUSG00000021764, ENSMUSG00000059734, ENSMUSG00000025968, ENSMUSG00000027673, ENSMUSG00000031231, ENSMUSG00000059534, ENSMUSG00000026032, ENSMUSG00000063882,…
24	Upregulated	0.00837	11	51	3.03945	Fanconi anemia pathway	http://www.genome.jp/kegg-bin/show_pathway?mmu03460	ENSMUSG00000030493, ENSMUSG00000017146, ENSMUSG00000032815, ENSMUSG00000032498, ENSMUSG00000079109, ENSMUSG00000025144, ENSMUSG00000028560, ENSMUSG00000047757, ENSMUSG00000034329, ENSMUSG00000032409, ENSMUSG00000073705
25	Upregulated	0.0164	8	33	3.49403	Base excision repair	http://www.genome.jp/kegg-bin/show_pathway?mmu03410	ENSMUSG00000066551, ENSMUSG00000056394, ENSMUSG00000027342, ENSMUSG00000038644, ENSMUSG00000020471, ENSMUSG00000029591, ENSMUSG00000028394, ENSMUSG00000028687
26	Upregulated	0.0183	20	146	2.036	Retrograde endocannabinoid signaling	http://www.genome.jp/kegg-bin/show_pathway?mmu04723	ENSMUSG00000032562, ENSMUSG00000064341, ENSMUSG00000064345, ENSMUSG00000064363, ENSMUSG00000064367, ENSMUSG00000064368, ENSMUSG00000014294, ENSMUSG00000021764, ENSMUSG00000059734, ENSMUSG00000025968, ENSMUSG00000033174, ENSMUSG00000027673, ENSMUSG00000026032, ENSMUSG00000033938, ENSMUSG00000025204, ENSMUSG00000030647, ENSMUSG00000002416, ENSMUSG00000023089, ENSMUSG00000024099, ENSMUSG00000020153
27	Upregulated	0.0277	10	53	2.76314	Cysteine and methionine metabolism	http://www.genome.jp/kegg-bin/show_pathway?mmu00270	ENSMUSG00000024640, ENSMUSG00000048087, ENSMUSG00000075232, ENSMUSG00000004099, ENSMUSG00000063229, ENSMUSG00000020321, ENSMUSG00000053907, ENSMUSG00000053398, ENSMUSG00000027597, ENSMUSG00000010911
28	Upregulated	0.0333	6	27	3.86839	Protein export	http://www.genome.jp/kegg-bin/show_pathway?mmu03060	ENSMUSG00000078974, ENSMUSG00000009549, ENSMUSG00000014504, ENSMUSG00000036323, ENSMUSG00000021917, ENSMUSG00000027706
29	Downregulated	7.18e-07	31	135	3.24622	Lysosome	http://www.genome.jp/kegg-bin/show_pathway?mmu04142	ENSMUSG00000040560, ENSMUSG00000033128, ENSMUSG00000025534, ENSMUSG00000022257, ENSMUSG00000021686, ENSMUSG00000022620, ENSMUSG00000031591, ENSMUSG00000013160, ENSMUSG00000019302, ENSMUSG00000045594, ENSMUSG00000018774, ENSMUSG00000030894, ENSMUSG00000021939, ENSMUSG00000007891, ENSMUSG00000021477, ENSMUSG00000003812, ENSMUSG00000028048, ENSMUSG00000025232, ENSMUSG00000035847, ENSMUSG00000033540,…
30	Downregulated	1.77e-05	32	205	2.72957	NOD-like receptor signaling pathway	http://www.genome.jp/kegg-bin/show_pathway?mmu04621	ENSMUSG00000033538, ENSMUSG00000021939, ENSMUSG00000040264, ENSMUSG00000028270, ENSMUSG00000029380, ENSMUSG00000023944, ENSMUSG00000022971, ENSMUSG00000004221, ENSMUSG00000002325, ENSMUSG00000030287, ENSMUSG00000042644, ENSMUSG00000032508, ENSMUSG00000021025, ENSMUSG00000024927, ENSMUSG00000035042, ENSMUSG00000026104, ENSMUSG00000040033, ENSMUSG00000009647, ENSMUSG00000026637, ENSMUSG00000040253,…
31	Downregulated	3.33e-05	29	162	2.7067	Hepatitis C	http://www.genome.jp/kegg-bin/show_pathway?mmu05160	ENSMUSG00000001127, ENSMUSG00000006932, ENSMUSG00000040274, ENSMUSG00000023067, ENSMUSG00000031639, ENSMUSG00000029613, ENSMUSG00000034855, ENSMUSG00000034459, ENSMUSG00000022971, ENSMUSG00000004221, ENSMUSG00000002325, ENSMUSG00000032193, ENSMUSG00000023341, ENSMUSG00000021025, ENSMUSG00000022105, ENSMUSG00000024927, ENSMUSG00000024241, ENSMUSG00000026104, ENSMUSG00000040033, ENSMUSG00000004040,…
32	Downregulated	3.33e-05	29	172	2.68723	Influenza A	http://www.genome.jp/kegg-bin/show_pathway?mmu05164	ENSMUSG00000059743, ENSMUSG00000040274, ENSMUSG00000022521, ENSMUSG00000031639, ENSMUSG00000034855, ENSMUSG00000022971, ENSMUSG00000004221, ENSMUSG00000002325, ENSMUSG00000023341, ENSMUSG00000032508, ENSMUSG00000021025, ENSMUSG00000036986, ENSMUSG00000024927, ENSMUSG00000035042, ENSMUSG00000026104, ENSMUSG00000040033, ENSMUSG00000000275, ENSMUSG00000030341, ENSMUSG00000040296, ENSMUSG00000066800,…
33	Downregulated	3.33e-05	35	216	2.46342	Kaposi sarcoma-associated herpesvirus infection	http://www.genome.jp/kegg-bin/show_pathway?mmu05167	ENSMUSG00000006932, ENSMUSG00000040274, ENSMUSG00000023067, ENSMUSG00000022521, ENSMUSG00000031639, ENSMUSG00000032192, ENSMUSG00000036402, ENSMUSG00000029380, ENSMUSG00000073411, ENSMUSG00000053835, ENSMUSG00000022971, ENSMUSG00000004221, ENSMUSG00000021756, ENSMUSG00000002325, ENSMUSG00000030287, ENSMUSG00000042644, ENSMUSG00000031902, ENSMUSG00000021025, ENSMUSG00000028161, ENSMUSG00000032487,…
34	Downregulated	3.33e-05	35	222	2.42368	Epstein-Barr virus infection	http://www.genome.jp/kegg-bin/show_pathway?mmu05169	ENSMUSG00000027381, ENSMUSG00000005087, ENSMUSG00000040274, ENSMUSG00000023067, ENSMUSG00000036390, ENSMUSG00000073411, ENSMUSG00000053835, ENSMUSG00000022528, ENSMUSG00000034855, ENSMUSG00000022971, ENSMUSG00000004221, ENSMUSG00000002325, ENSMUSG00000061132, ENSMUSG00000020184, ENSMUSG00000032508, ENSMUSG00000032216, ENSMUSG00000025225, ENSMUSG00000021025, ENSMUSG00000028932, ENSMUSG00000022105,…
35	Downregulated	0.000149	25	131	2.70591	FoxO signaling pathway	http://www.genome.jp/kegg-bin/show_pathway?mmu04068	ENSMUSG00000001127, ENSMUSG00000027381, ENSMUSG00000027187, ENSMUSG00000023067, ENSMUSG00000028680, ENSMUSG00000022521, ENSMUSG00000036390, ENSMUSG00000005533, ENSMUSG00000055148, ENSMUSG00000032402, ENSMUSG00000024515, ENSMUSG00000020184, ENSMUSG00000031666, ENSMUSG00000021701, ENSMUSG00000024241, ENSMUSG00000004040, ENSMUSG00000002603, ENSMUSG00000063065, ENSMUSG00000055024, ENSMUSG00000038894,…
36	Downregulated	0.000442	17	71	3.22004	Adherens junction	http://www.genome.jp/kegg-bin/show_pathway?mmu04520	ENSMUSG00000015143, ENSMUSG00000037815, ENSMUSG00000006932, ENSMUSG00000022521, ENSMUSG00000046707, ENSMUSG00000031565, ENSMUSG00000005533, ENSMUSG00000032402, ENSMUSG00000024515, ENSMUSG00000068036, ENSMUSG00000062300, ENSMUSG00000025006, ENSMUSG00000022676, ENSMUSG00000063065, ENSMUSG00000030536, ENSMUSG00000055024, ENSMUSG00000025812
37	Downregulated	0.000442	46	352	1.9051	Human papillomavirus infection	http://www.genome.jp/kegg-bin/show_pathway?mmu05165	ENSMUSG00000048930, ENSMUSG00000006273, ENSMUSG00000013160, ENSMUSG00000019302, ENSMUSG00000006932, ENSMUSG00000040274, ENSMUSG00000023067, ENSMUSG00000031503, ENSMUSG00000029661, ENSMUSG00000022521, ENSMUSG00000022770, ENSMUSG00000031490, ENSMUSG00000031639, ENSMUSG00000073411, ENSMUSG00000053835, ENSMUSG00000022528, ENSMUSG00000022971, ENSMUSG00000004221, ENSMUSG00000002325, ENSMUSG00000001281,…
38	Downregulated	0.000517	8	21	6.06125	Glycosaminoglycan degradation	http://www.genome.jp/kegg-bin/show_pathway?mmu00531	ENSMUSG00000025534, ENSMUSG00000045594, ENSMUSG00000025232, ENSMUSG00000035273, ENSMUSG00000035847, ENSMUSG00000033540, ENSMUSG00000001751, ENSMUSG00000034707
39	Downregulated	0.00075	20	112	2.74046	C-type lectin receptor signaling pathway	http://www.genome.jp/kegg-bin/show_pathway?mmu04625	ENSMUSG00000028191, ENSMUSG00000028680, ENSMUSG00000033730, ENSMUSG00000004221, ENSMUSG00000002325, ENSMUSG00000030287, ENSMUSG00000042644, ENSMUSG00000020184, ENSMUSG00000031902, ENSMUSG00000025225, ENSMUSG00000021025, ENSMUSG00000028161, ENSMUSG00000032487, ENSMUSG00000024927, ENSMUSG00000002983, ENSMUSG00000038387, ENSMUSG00000026104, ENSMUSG00000040033, ENSMUSG00000063065, ENSMUSG00000059495
40	Downregulated	0.00155	21	124	2.52788	Osteoclast differentiation	http://www.genome.jp/kegg-bin/show_pathway?mmu04380	ENSMUSG00000003545, ENSMUSG00000004508, ENSMUSG00000022971, ENSMUSG00000004221, ENSMUSG00000026072, ENSMUSG00000002325, ENSMUSG00000071076, ENSMUSG00000061132, ENSMUSG00000035158, ENSMUSG00000025225, ENSMUSG00000021025, ENSMUSG00000015837, ENSMUSG00000028161, ENSMUSG00000024927, ENSMUSG00000002983, ENSMUSG00000026104, ENSMUSG00000040033, ENSMUSG00000002603, ENSMUSG00000030341, ENSMUSG00000002948,…
41	Downregulated	0.0016	61	542	1.63345	Pathways in cancer	http://www.genome.jp/kegg-bin/show_pathway?mmu05200	ENSMUSG00000053819, ENSMUSG00000001127, ENSMUSG00000015522, ENSMUSG00000021070, ENSMUSG00000027381, ENSMUSG00000037815, ENSMUSG00000006932, ENSMUSG00000034342, ENSMUSG00000040274, ENSMUSG00000023067, ENSMUSG00000031503, ENSMUSG00000022521, ENSMUSG00000036390, ENSMUSG00000036585, ENSMUSG00000031565, ENSMUSG00000020611, ENSMUSG00000032192, ENSMUSG00000036402, ENSMUSG00000032348, ENSMUSG00000058135,…
42	Downregulated	0.00181	33	248	2.00493	Human cytomegalovirus infection	http://www.genome.jp/kegg-bin/show_pathway?mmu05163	ENSMUSG00000006932, ENSMUSG00000040274, ENSMUSG00000023067, ENSMUSG00000031490, ENSMUSG00000020611, ENSMUSG00000032192, ENSMUSG00000036402, ENSMUSG00000073411, ENSMUSG00000053835, ENSMUSG00000004221, ENSMUSG00000026072, ENSMUSG00000030287, ENSMUSG00000042644, ENSMUSG00000040940, ENSMUSG00000020184, ENSMUSG00000031902, ENSMUSG00000021025, ENSMUSG00000028161, ENSMUSG00000032487, ENSMUSG00000022105,…
43	Downregulated	0.00203	16	76	2.86226	Chronic myeloid leukemia	http://www.genome.jp/kegg-bin/show_pathway?mmu05220	ENSMUSG00000001127, ENSMUSG00000034342, ENSMUSG00000040274, ENSMUSG00000023067, ENSMUSG00000036390, ENSMUSG00000004508, ENSMUSG00000004221, ENSMUSG00000032402, ENSMUSG00000024515, ENSMUSG00000020184, ENSMUSG00000021025, ENSMUSG00000022105, ENSMUSG00000024927, ENSMUSG00000024241, ENSMUSG00000002603, ENSMUSG00000063065
44	Downregulated	0.00214	18	105	2.63458	NF-kappa B signaling pathway	http://www.genome.jp/kegg-bin/show_pathway?mmu04064	ENSMUSG00000028191, ENSMUSG00000051439, ENSMUSG00000046707, ENSMUSG00000036390, ENSMUSG00000029380, ENSMUSG00000004221, ENSMUSG00000026072, ENSMUSG00000061132, ENSMUSG00000032508, ENSMUSG00000025225, ENSMUSG00000021025, ENSMUSG00000032487, ENSMUSG00000024927, ENSMUSG00000002983, ENSMUSG00000000275, ENSMUSG00000030341, ENSMUSG00000026637, ENSMUSG00000040296
45	Downregulated	0.00214	22	146	2.36136	Measles	http://www.genome.jp/kegg-bin/show_pathway?mmu05162	ENSMUSG00000040274, ENSMUSG00000046707, ENSMUSG00000029613, ENSMUSG00000022971, ENSMUSG00000004221, ENSMUSG00000002325, ENSMUSG00000023341, ENSMUSG00000032508, ENSMUSG00000021025, ENSMUSG00000024927, ENSMUSG00000026104, ENSMUSG00000040033, ENSMUSG00000004040, ENSMUSG00000040296, ENSMUSG00000032661, ENSMUSG00000052776, ENSMUSG00000025498, ENSMUSG00000079316, ENSMUSG00000027951, ENSMUSG00000022812,…
46	Downregulated	0.00518	24	163	2.13189	Hepatitis B	http://www.genome.jp/kegg-bin/show_pathway?mmu05161	ENSMUSG00000001127, ENSMUSG00000023067, ENSMUSG00000022521, ENSMUSG00000033730, ENSMUSG00000031639, ENSMUSG00000004221, ENSMUSG00000032402, ENSMUSG00000024515, ENSMUSG00000032508, ENSMUSG00000031902, ENSMUSG00000021025, ENSMUSG00000022105, ENSMUSG00000024927, ENSMUSG00000024241, ENSMUSG00000026104, ENSMUSG00000040033, ENSMUSG00000004040, ENSMUSG00000002603, ENSMUSG00000040296, ENSMUSG00000002948,…
47	Downregulated	0.00767	15	93	2.61084	IL-17 signaling pathway	http://www.genome.jp/kegg-bin/show_pathway?mmu04657	ENSMUSG00000056501, ENSMUSG00000003545, ENSMUSG00000029380, ENSMUSG00000023944, ENSMUSG00000034855, ENSMUSG00000004221, ENSMUSG00000071076, ENSMUSG00000050578, ENSMUSG00000021025, ENSMUSG00000032487, ENSMUSG00000024927, ENSMUSG00000029371, ENSMUSG00000026637, ENSMUSG00000063065, ENSMUSG00000022812
48	Downregulated	0.00965	11	63	3.08004	Cytosolic DNA-sensing pathway	http://www.genome.jp/kegg-bin/show_pathway?mmu04623	ENSMUSG00000034855, ENSMUSG00000004221, ENSMUSG00000021025, ENSMUSG00000024927, ENSMUSG00000035042, ENSMUSG00000025280, ENSMUSG00000040296, ENSMUSG00000025498, ENSMUSG00000027951, ENSMUSG00000027514, ENSMUSG00000004667
49	Downregulated	0.0105	17	99	2.35444	Prostate cancer	http://www.genome.jp/kegg-bin/show_pathway?mmu05215	ENSMUSG00000001127, ENSMUSG00000006932, ENSMUSG00000023067, ENSMUSG00000022521, ENSMUSG00000031565, ENSMUSG00000023944, ENSMUSG00000005533, ENSMUSG00000004221, ENSMUSG00000020184, ENSMUSG00000021025, ENSMUSG00000031538, ENSMUSG00000022105, ENSMUSG00000024927, ENSMUSG00000024241, ENSMUSG00000063065, ENSMUSG00000055024, ENSMUSG00000022812
50	Downregulated	0.011	24	175	1.99435	Cellular senescence	http://www.genome.jp/kegg-bin/show_pathway?mmu04218	ENSMUSG00000019842, ENSMUSG00000021127, ENSMUSG00000045817, ENSMUSG00000040274, ENSMUSG00000023067, ENSMUSG00000036390, ENSMUSG00000031490, ENSMUSG00000073411, ENSMUSG00000053835, ENSMUSG00000008730, ENSMUSG00000030287, ENSMUSG00000042644, ENSMUSG00000032402, ENSMUSG00000020184, ENSMUSG00000031902, ENSMUSG00000015837, ENSMUSG00000028161, ENSMUSG00000022105, ENSMUSG00000031666, ENSMUSG00000024927,…
51	Downregulated	0.011	22	145	2.06835	Fluid shear stress and atherosclerosis	http://www.genome.jp/kegg-bin/show_pathway?mmu05418	ENSMUSG00000006932, ENSMUSG00000021477, ENSMUSG00000032348, ENSMUSG00000058135, ENSMUSG00000040562, ENSMUSG00000005413, ENSMUSG00000023944, ENSMUSG00000004221, ENSMUSG00000026072, ENSMUSG00000055148, ENSMUSG00000028059, ENSMUSG00000030557, ENSMUSG00000015839, ENSMUSG00000015837, ENSMUSG00000031538, ENSMUSG00000024190, ENSMUSG00000024927, ENSMUSG00000030341, ENSMUSG00000023951, ENSMUSG00000058444,…
52	Downregulated	0.0165	14	76	2.47017	Pancreatic cancer	http://www.genome.jp/kegg-bin/show_pathway?mmu05212	ENSMUSG00000001127, ENSMUSG00000040274, ENSMUSG00000023067, ENSMUSG00000036390, ENSMUSG00000004221, ENSMUSG00000032402, ENSMUSG00000024515, ENSMUSG00000022105, ENSMUSG00000024927, ENSMUSG00000026104, ENSMUSG00000004040, ENSMUSG00000002603, ENSMUSG00000023951, ENSMUSG00000063065
53	Downregulated	0.0237	27	220	1.80189	Viral carcinogenesis	http://www.genome.jp/kegg-bin/show_pathway?mmu05203	ENSMUSG00000015143, ENSMUSG00000013160, ENSMUSG00000040274, ENSMUSG00000023067, ENSMUSG00000022521, ENSMUSG00000022770, ENSMUSG00000033730, ENSMUSG00000073411, ENSMUSG00000053835, ENSMUSG00000004221, ENSMUSG00000021756, ENSMUSG00000002325, ENSMUSG00000020184, ENSMUSG00000025225, ENSMUSG00000021025, ENSMUSG00000022105, ENSMUSG00000031666, ENSMUSG00000039191, ENSMUSG00000024927, ENSMUSG00000026222,…
54	Downregulated	0.0361	26	201	1.76255	Proteoglycans in cancer	http://www.genome.jp/kegg-bin/show_pathway?mmu05205	ENSMUSG00000001127, ENSMUSG00000006932, ENSMUSG00000034342, ENSMUSG00000005087, ENSMUSG00000023067, ENSMUSG00000029661, ENSMUSG00000021477, ENSMUSG00000007805, ENSMUSG00000031565, ENSMUSG00000035273, ENSMUSG00000005533, ENSMUSG00000030287, ENSMUSG00000042644, ENSMUSG00000040940, ENSMUSG00000020184, ENSMUSG00000019907, ENSMUSG00000038387, ENSMUSG00000024241, ENSMUSG00000004040, ENSMUSG00000002603,…
55	Downregulated	0.0361	23	173	1.84002	Hepatocellular carcinoma	http://www.genome.jp/kegg-bin/show_pathway?mmu05225	ENSMUSG00000001127, ENSMUSG00000006932, ENSMUSG00000040274, ENSMUSG00000023067, ENSMUSG00000036390, ENSMUSG00000032348, ENSMUSG00000058135, ENSMUSG00000040562, ENSMUSG00000005413, ENSMUSG00000005533, ENSMUSG00000032402, ENSMUSG00000024515, ENSMUSG00000015839, ENSMUSG00000022105, ENSMUSG00000024241, ENSMUSG00000047604, ENSMUSG00000002603, ENSMUSG00000026167, ENSMUSG00000063065, ENSMUSG00000020250,…
56	Downregulated	0.0404	34	294	1.61002	MAPK signaling pathway	http://www.genome.jp/kegg-bin/show_pathway?mmu04010	ENSMUSG00000001127, ENSMUSG00000029378, ENSMUSG00000051439, ENSMUSG00000002307, ENSMUSG00000036390, ENSMUSG00000036585, ENSMUSG00000031565, ENSMUSG00000036402, ENSMUSG00000005533, ENSMUSG00000004221, ENSMUSG00000026072, ENSMUSG00000071076, ENSMUSG00000032508, ENSMUSG00000031902, ENSMUSG00000025225, ENSMUSG00000027859, ENSMUSG00000061130, ENSMUSG00000028161, ENSMUSG00000024190, ENSMUSG00000024927,…
